# Supplementary material for: The evolution of colistin resistance increases bacterial resistance to host antimicrobial peptides and virulence
Source: eLife journal article supplement (doi:10.7554/elife.84395), 2023-04-11
Supplement: figures [file elife-84395-figures-v2.pdf]

---

## Figures and figure supplements

The evolution of colistin resistance increases bacterial resistance to host antimicrobial peptides and virulence

**Pramod K Jangir et al.**

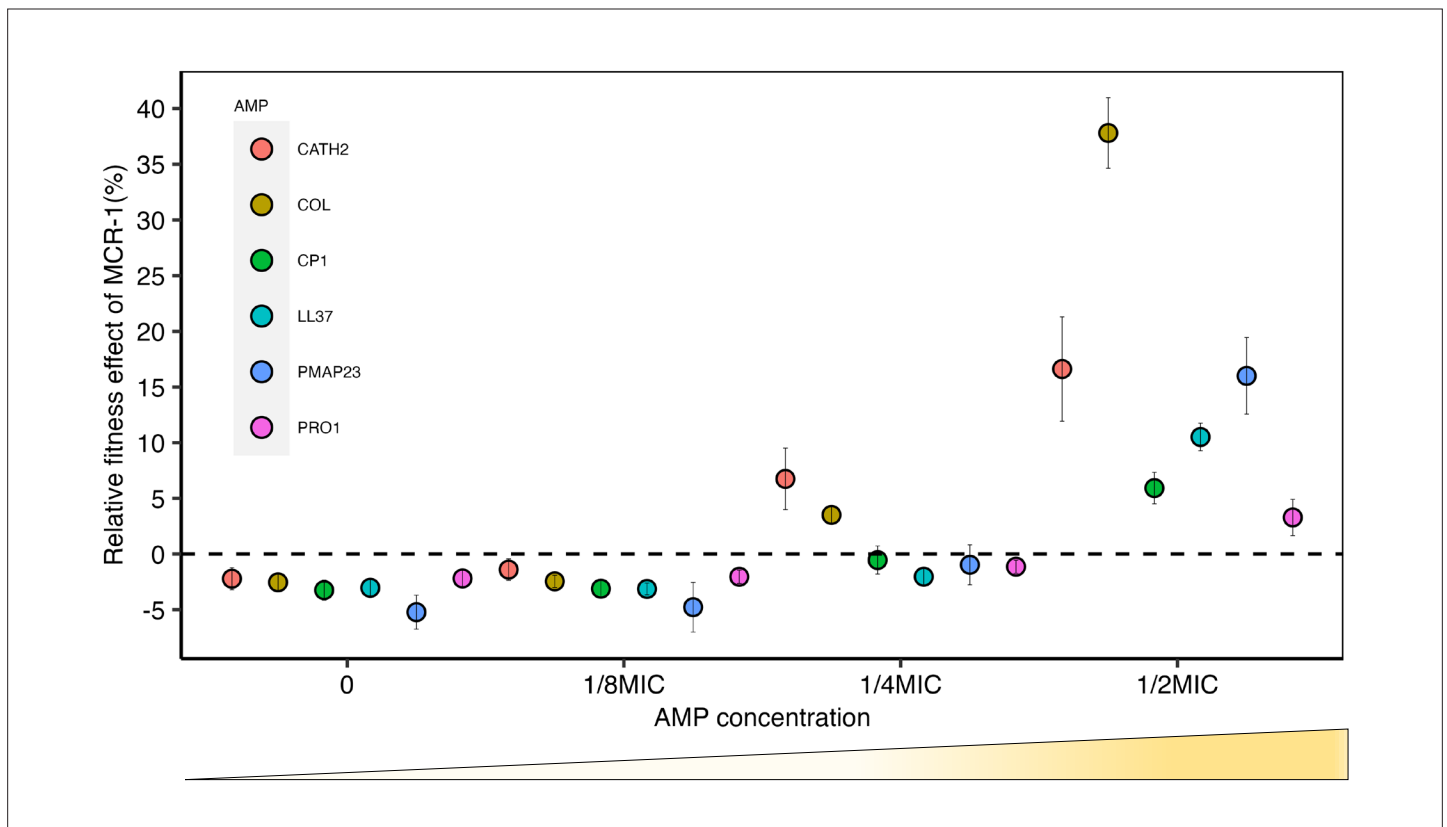

**Figure 1.** Sub-minimum inhibitory concentration (sub-MIC) doses of antimicrobial peptides (AMPs) generate selection for mobile colistin resistance (MCR). *E. coli* carrying *mcr-1* expression vector (pSEVA:MCR-1) or an empty vector control (pSEVA:EV) were competed against a tester strain carrying a chromosomally integrated GFP across a range of AMP concentrations ( $n = 6$  biological replicates per competition). Plotted points show the competitive fitness effect of the MCR-1 expressing strain relative to the empty vector control ( $\pm$ SE). To facilitate comparisons across AMPs, fitness is plotted as a function of relative AMP concentration, and the dashed line represents equal fitness.

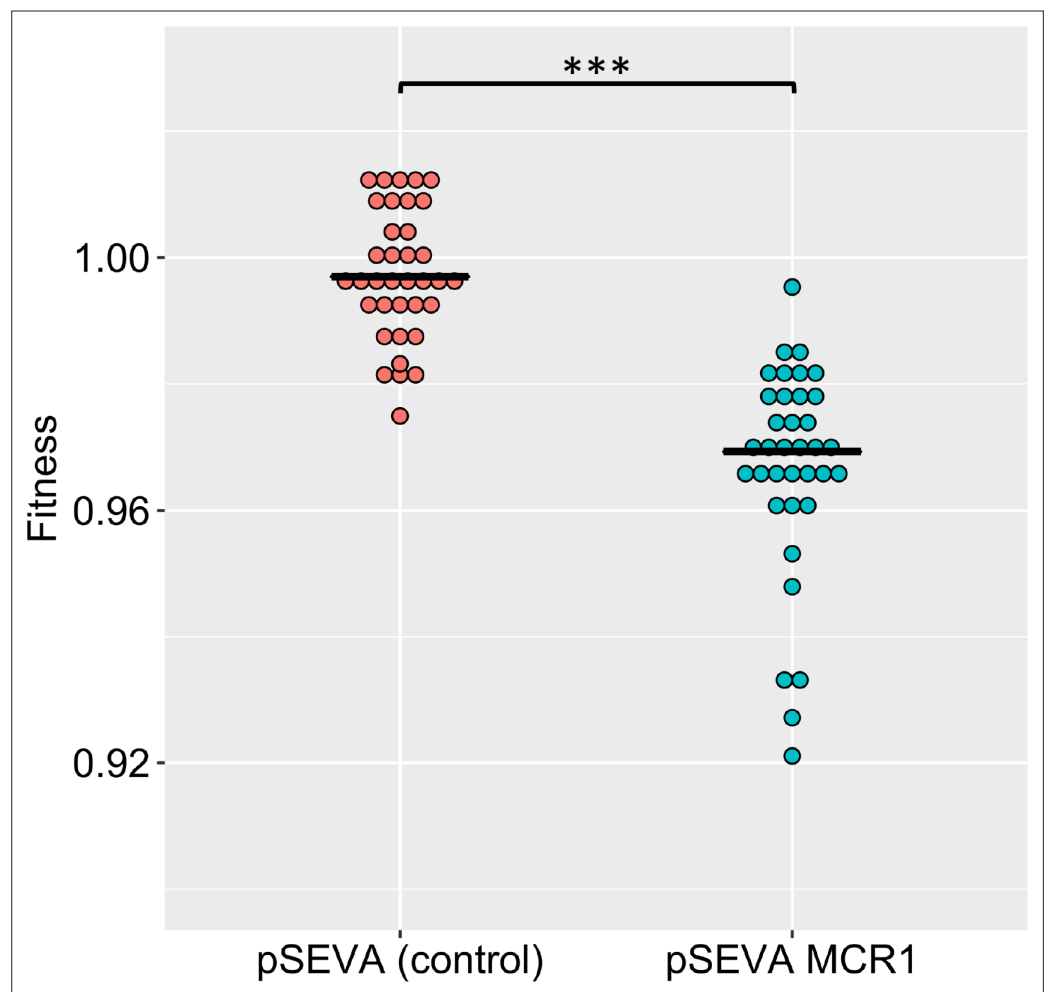

**Figure 1—figure supplement 1.** MCR-1 imposes a significant fitness burden in the absence of an antimicrobial peptide (AMP) ( $p=1.174e-15$ , from two-sided Mann–Whitney  $U$ -test,  $n=36$  for each genotype). In this figure, we have plotted fitness data for colistin and five host AMPs together for each genotype. Fitness was calculated by competing the pSEVA plasmid strains against GFP-labeled *E. coli* (see ‘Methods’).

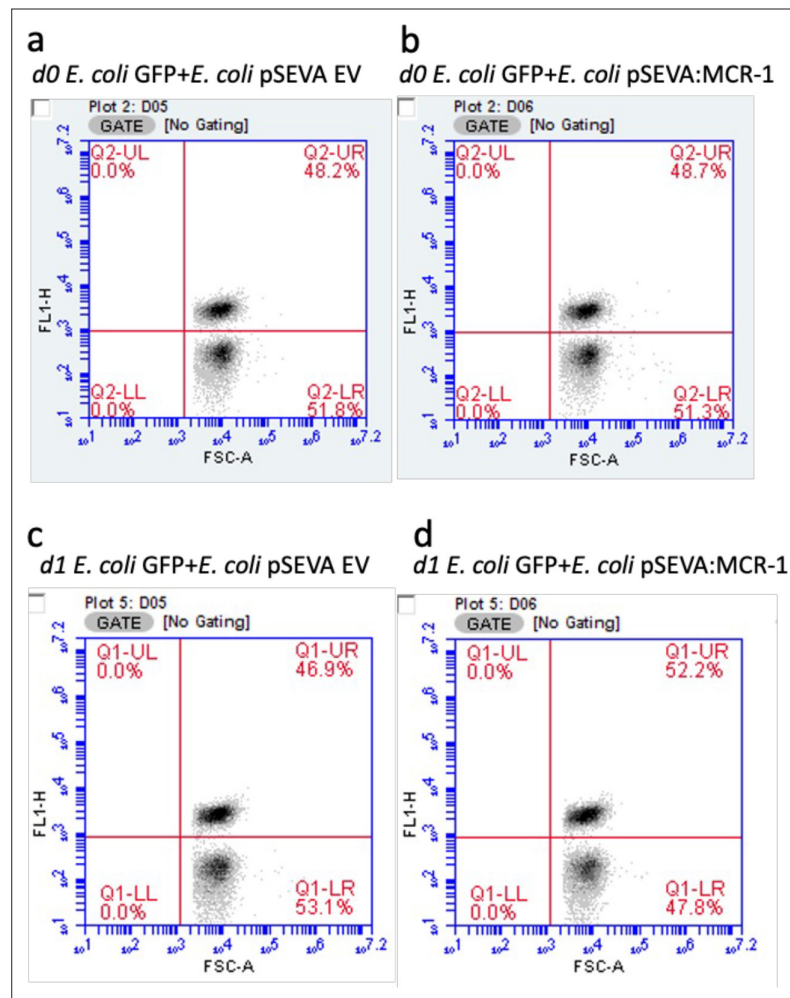

**Figure 1—figure supplement 2.** Gating strategy to analyze the selective fitness benefits of MCR-1. Figures show cell density of fluorescent (GFP-labeled *E. coli*; gate – UR) and nonfluorescent cells (*E. coli* pSEVA EV or *E. coli* pSEVA:MCR-1; gate – LR) before (**a**, **b**) and after the competition (**c**, **d**) in the absence of an antimicrobial peptide (AMP). Cells were gated using FL1-H and forward scatter properties. Data are provided in **Supplementary file 2**.

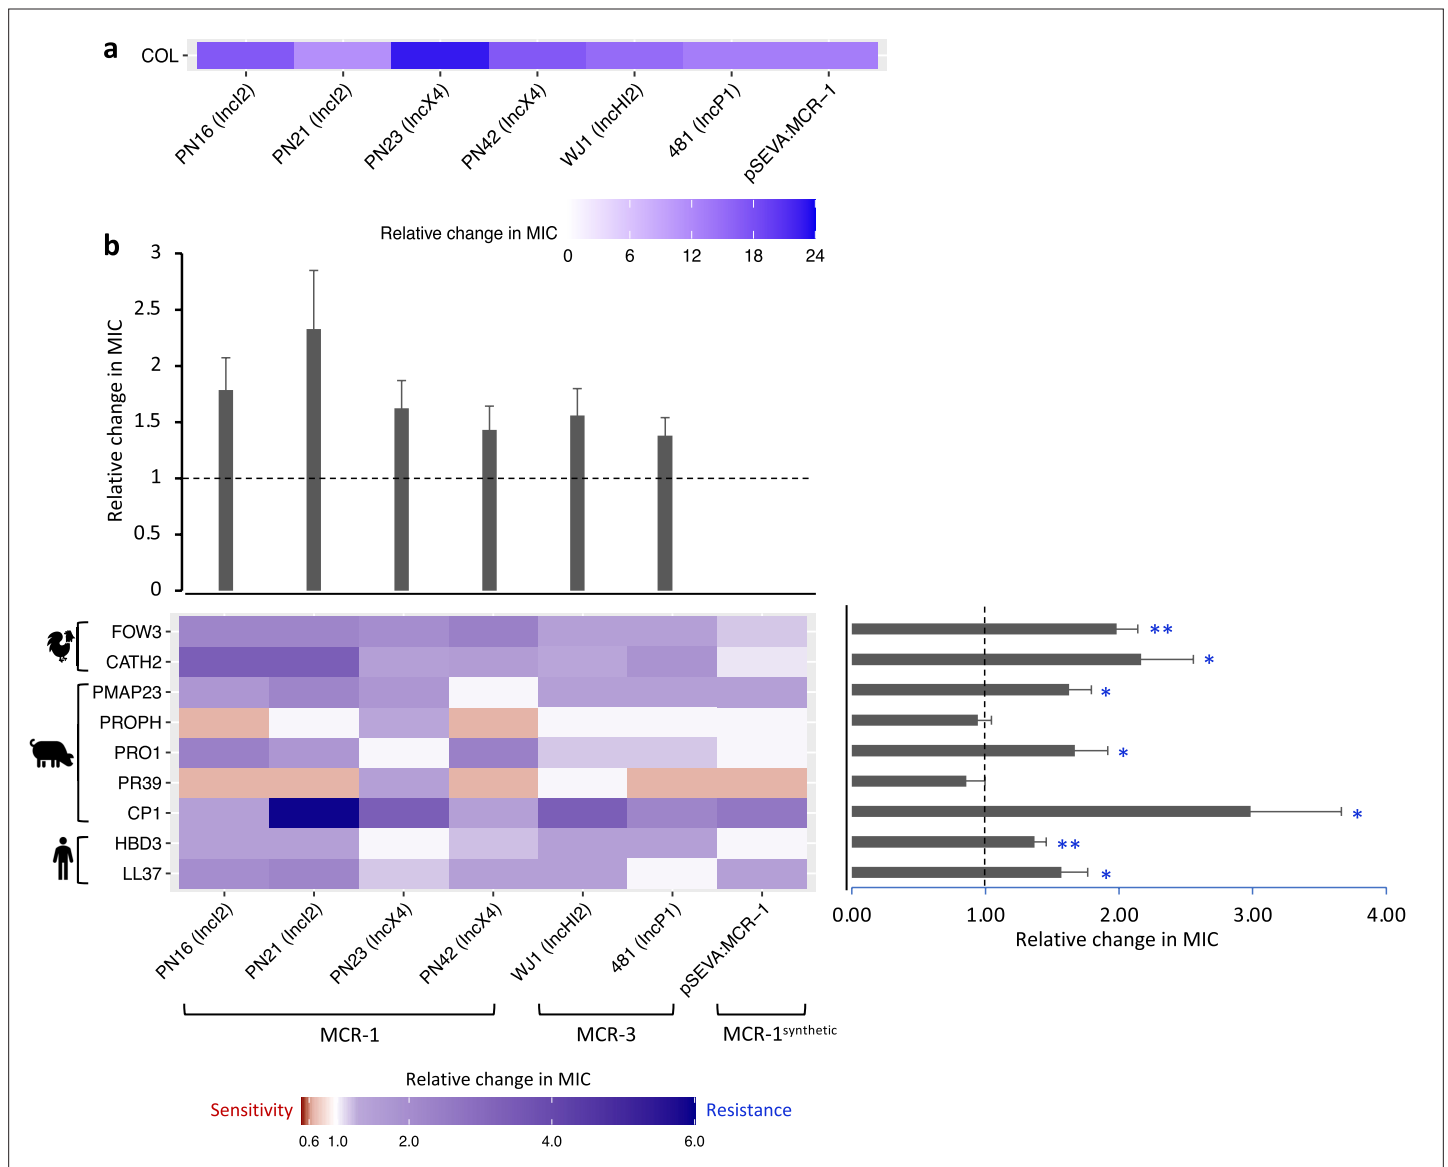

**Figure 2.** Mobile colistin resistance (MCR)-mediated changes in bacterial susceptibility to host antimicrobial peptides (AMPs). Heatmaps depict the effect of MCR plasmids on resistance to colistin (a) and host AMPs (b). Bacterial susceptibility to AMPs was tested by measuring minimum inhibitory concentrations (MICs), and changes in resistance were assessed relative to control strains lacking MCR (n = 3 biological replicates per MIC). Natural plasmids carried either MCR-1 or MCR-3 are shown according to plasmid incompatibility group. Resistance for these plasmids was measured relative to the *E. coli* J53 parental strain. The impact of the synthetic pSEVA:MCR-1 plasmid on resistance was measured relative to a strain with a pSEVA empty vector. Dashed lines represent control strain. Bar plots show average changes in MIC for natural MCR plasmids and did not include pSEVA:MCR1 ( $\pm$ SE; n = 9 for host AMPs, n = 6 for plasmids; \*p<0.05 one-sample t-test, LL37- 0.033; HBD3- 0.0088; CP1- 0.032; PR39- 0.353; PRO1- 0.0424; PROPH- 0.5964; PMAP23- 0.0136; CATH2- 0.030; FOW3- 0.001).

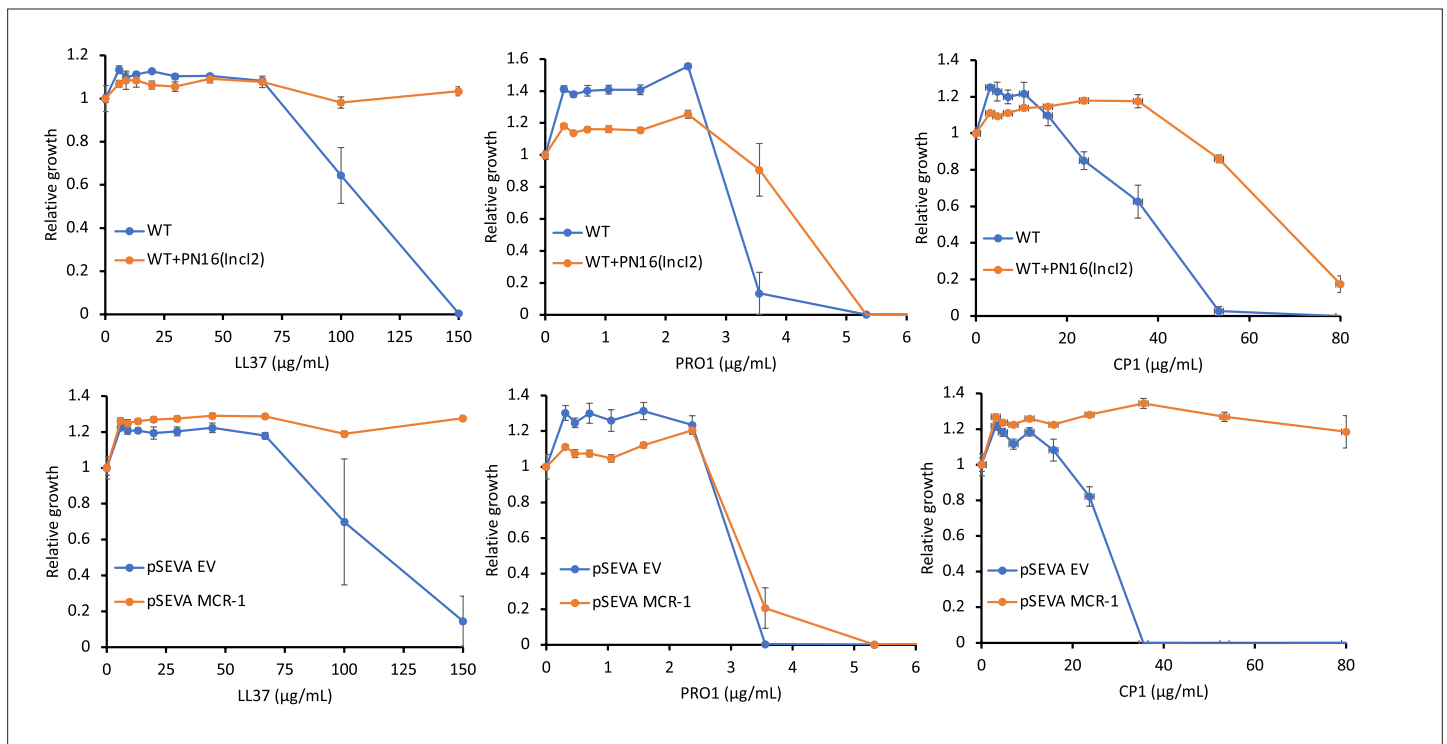

**Figure 2—figure supplement 1.** Antimicrobial peptide (AMP) susceptibility of *E. coli* carrying mobile colistin resistance (MCR) natural plasmids and the synthetic pSEVA:MCR-1. The minimum inhibitory concentration (MIC) assays were carried out in MHBII (cation-adjusted) medium. Error bars indicate standard errors based on three biological replicates.

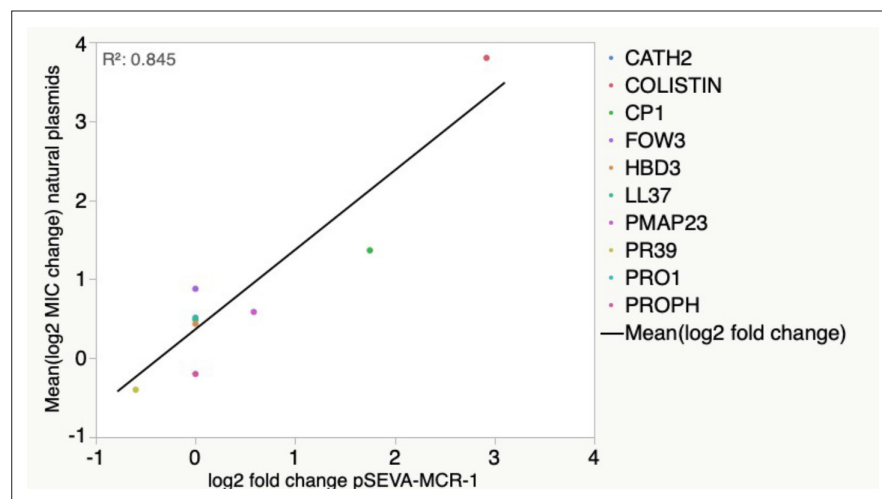

**Figure 2—figure supplement 2.** Antimicrobial peptide (AMP) resistance phenotype obtained for pSEVA:MCR-1 is highly correlated with those from the naturally occurring MCR-1 plasmids (linear regression  $F_{1,8} = 43.7$ ,  $p=0.0002$ ,  $r^2 = 0.845$ ).

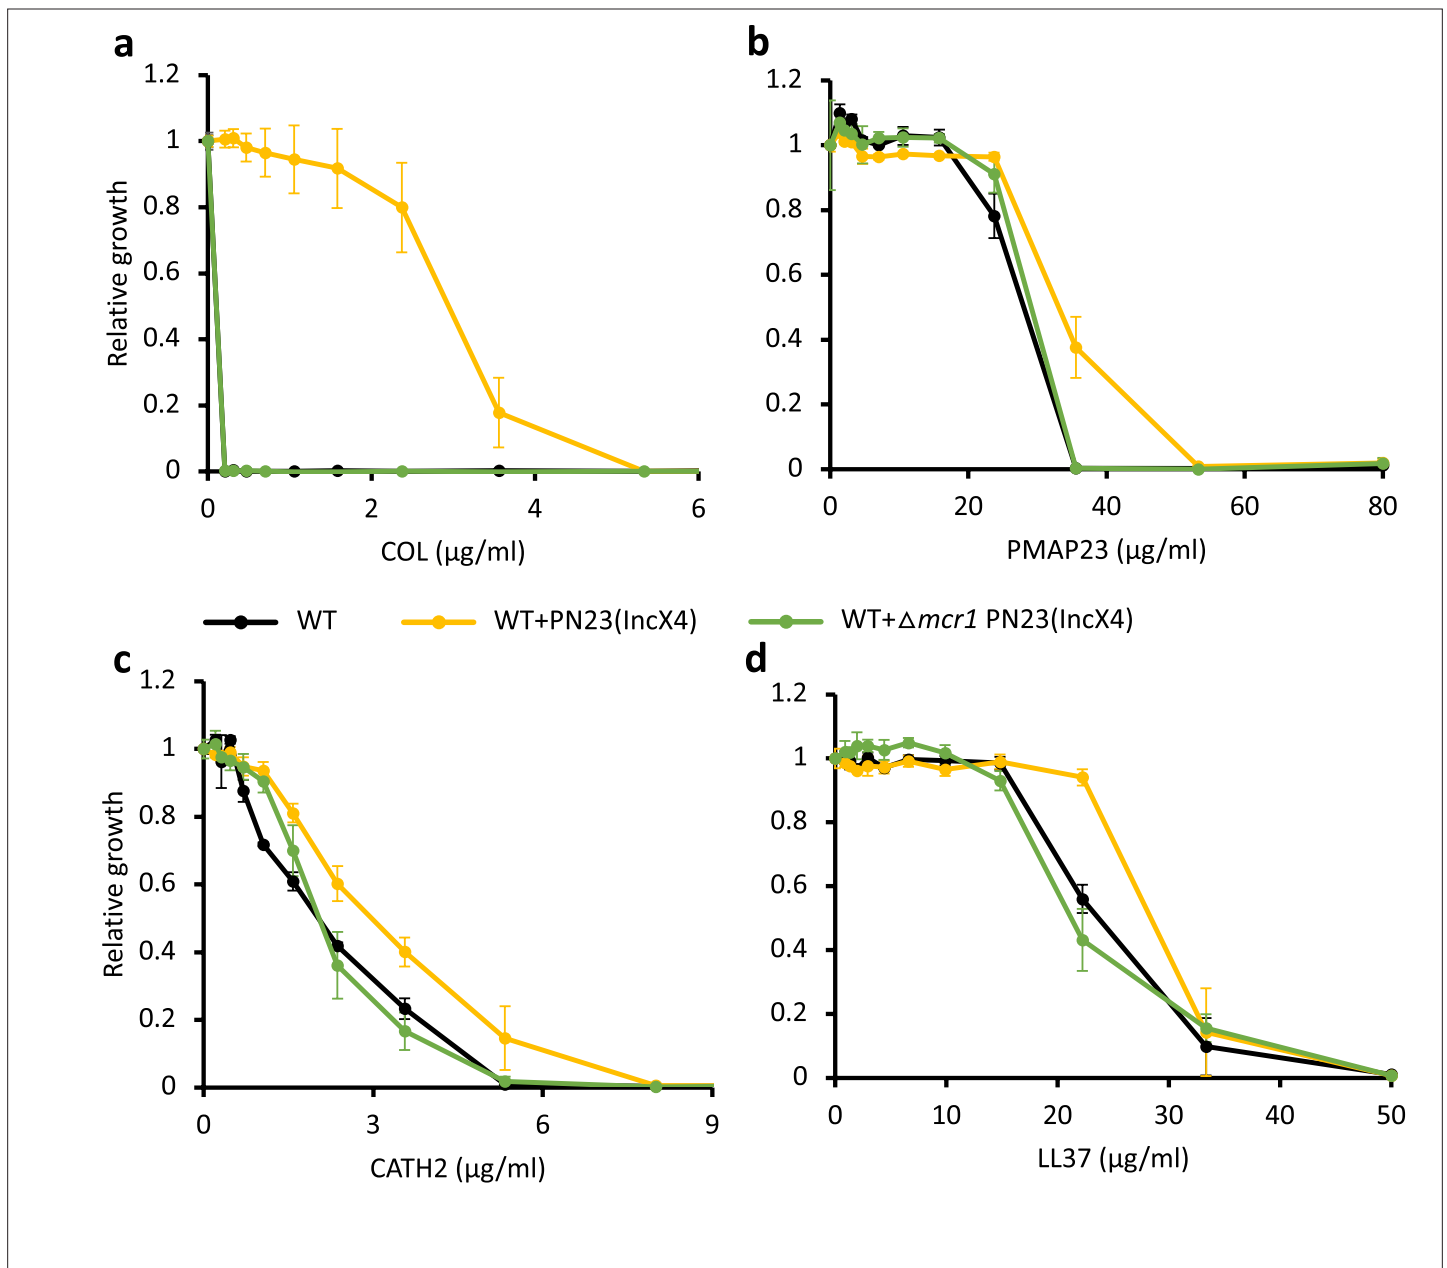

**Figure 2—figure supplement 3.** Deletion of MCR-1 from IncX4 natural plasmid results in antimicrobial peptide (AMP) susceptibility similar to the wild-type (WT) control strain. Bacterial susceptibility to colistin (a) and host AMPs (b-d). Growth is shown relative to growth in the absence of the given AMP (y-axis). Error bars indicate standard errors based on three biological replicates. Black line, WT control strain; yellow line, WT strain carrying IncX4 plasmid with *mcr-1* gene; green line, WT strain carrying IncX4 plasmid without *mcr-1* gene.



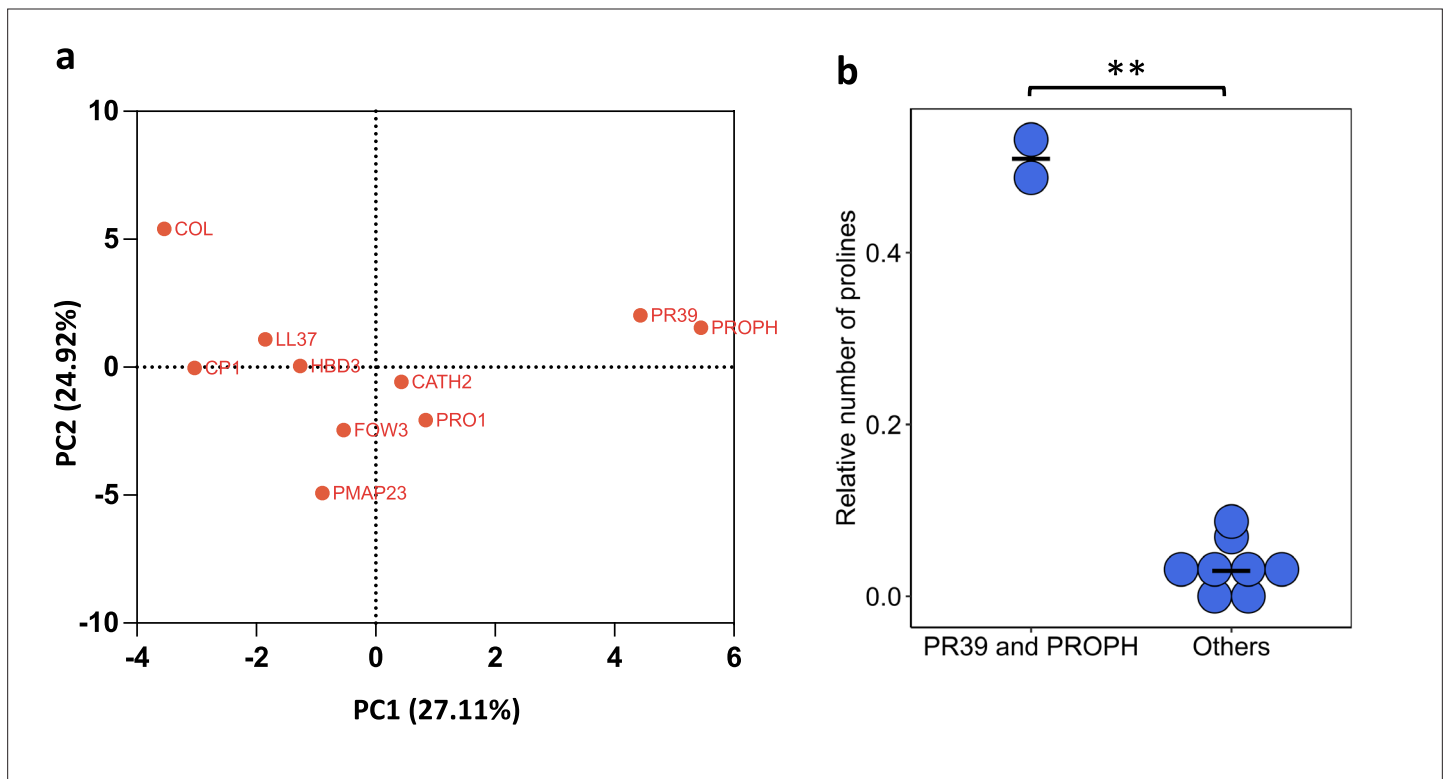

**Figure 2—figure supplement 4.** PR39 and PROPH differ from other antimicrobial peptides (AMPs) in their physicochemical properties. **(a)** Principal component analysis (PCA) of the physicochemical properties of AMPs. **(b)** PR39 and PROPH peptides can be distinguished from other AMPs based on their higher proline content (significant differences from Welch's two-sample *t*-test,  $p=0.0086$ ,  $n = 2$  and  $n = 8$  for PR39 and PROPH, and others, respectively).

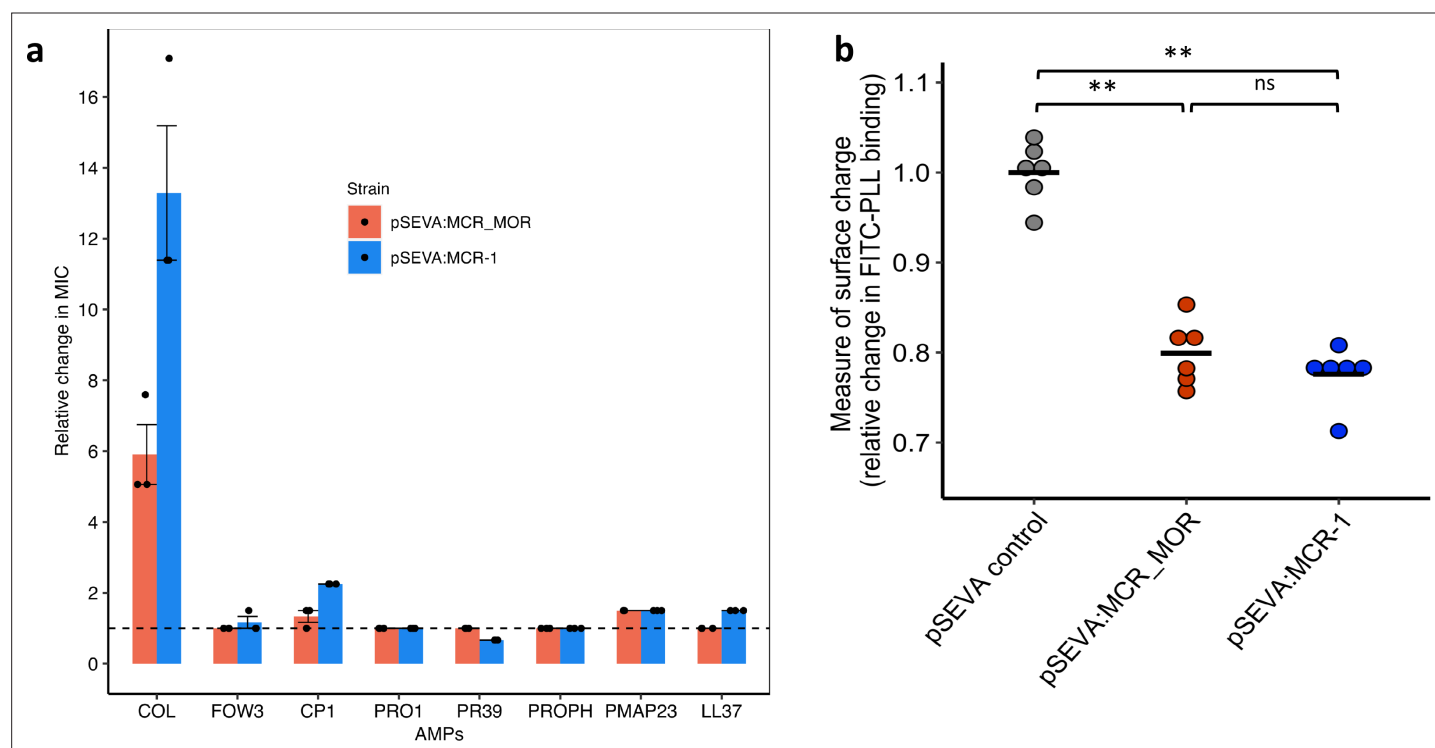

**Figure 3.** Effect of *Moraxella* MCR (MCR-MOR) on bacterial susceptibility to antimicrobial peptides (AMPs) (a) and on cell surface charge (b). (a) AMP susceptibility of *E. coli* carrying pSEVA:MCR-1 and *Moraxella* version of MCR (pSEVA:MCR-MOR). The impact of the pSEVA:MCR-1 and pSEVA:MCR-MOR on resistance was measured relative to a strain with a pSEVA empty vector control (dashed line). Error bars indicate standard errors based on three biological replicates. (b) Relative cell surface charge of *E. coli* strains expressing MCR-1 and MCR-MOR compared to an empty vector control. Cell surface was determined by FITC-PLL binding assay (n = 6 biological replicates/strain). Statistical significance was determined by pairwise comparisons using the two-sided Mann–Whitney U-tests, and double asterisks show differences with a p-value < 0.01.

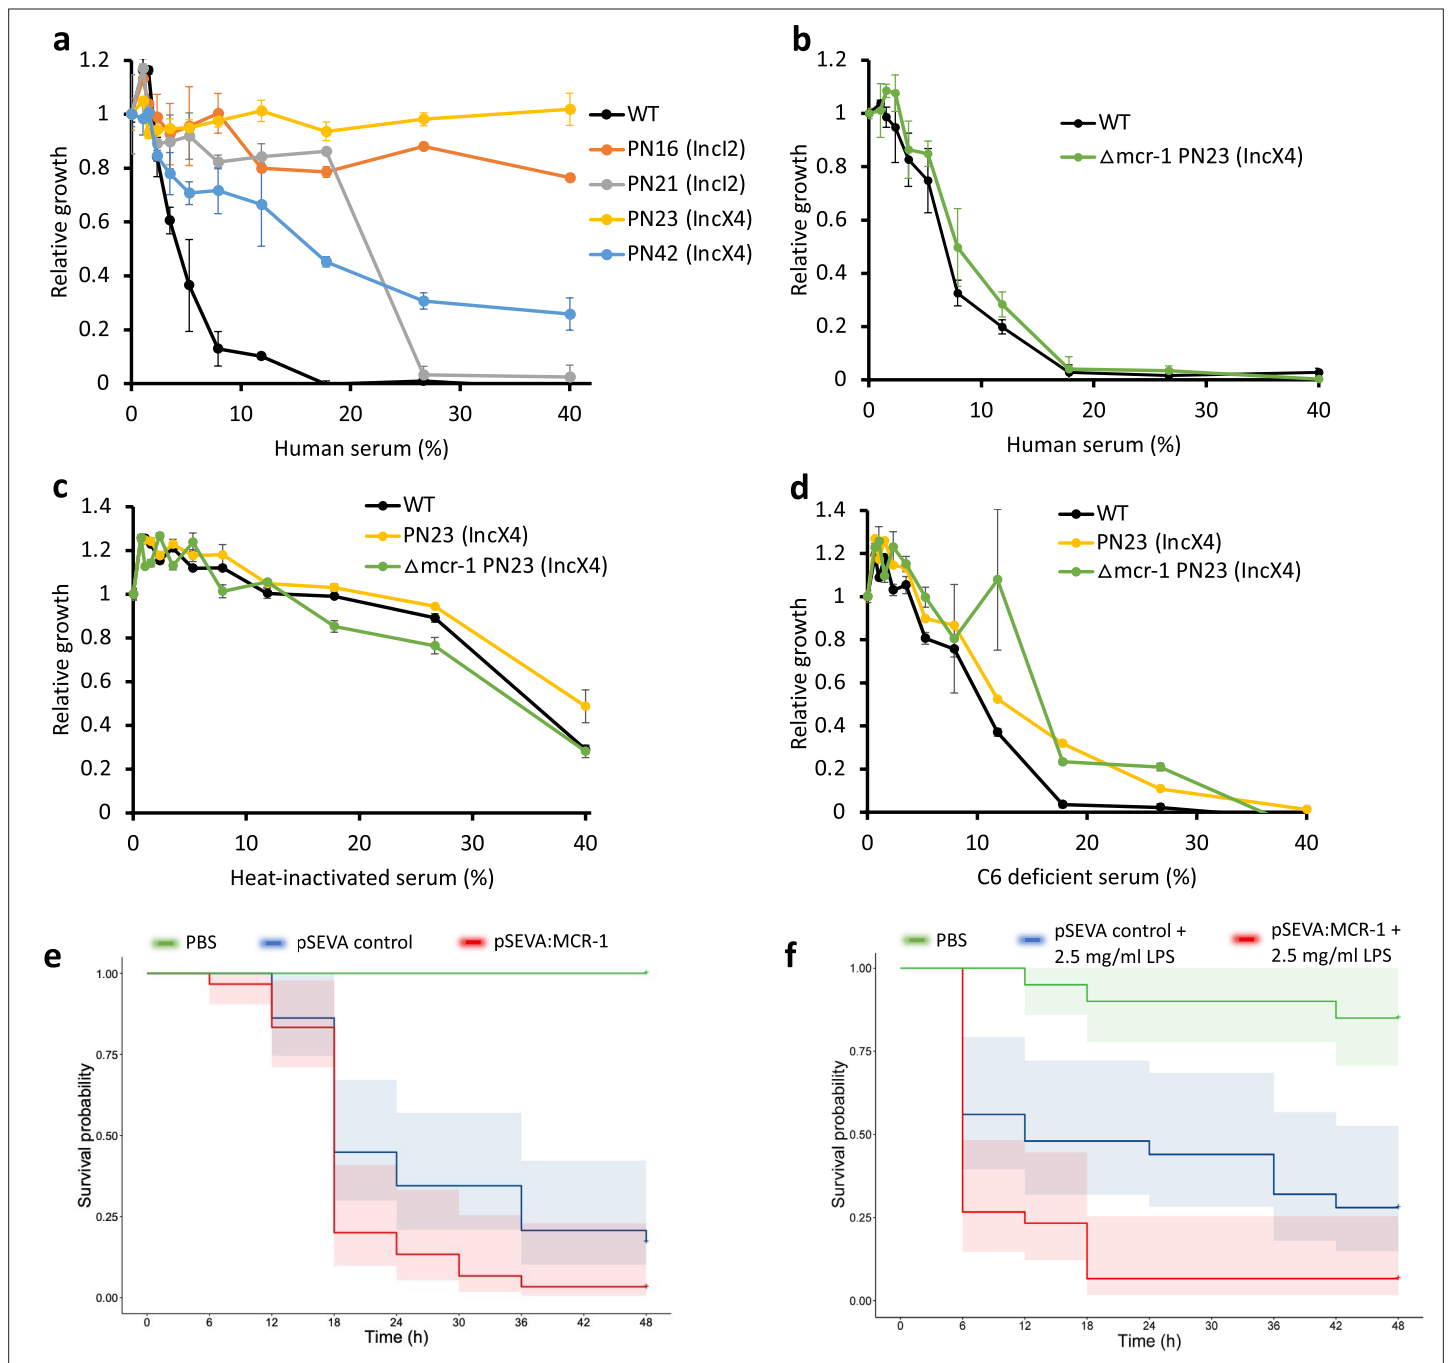

**Figure 4.** Mobile colistin resistance (MCR) confers resistance to human serum and increases bacterial virulence. **(a–d)** Bacterial susceptibility to human serum was determined by measuring bacterial growth in a medium containing human serum relative to serum-free controls ( $\pm$  SEM;  $n = 3$  biological replicates/strain). **(a)** Serum susceptibility of the wild-type (WT) parental strain and transconjugants carrying natural MCR plasmids. **(b)** Serum susceptibility of the WT parental strain and transconjugant carrying a plasmid with a deletion of *mcr-1*. **(c, d)** Susceptibility of *E. coli* with and without natural MCR plasmid against C6-deficient and heat-inactivated serum. **(e, f)** Survival of *G. mellonella* larvae following injection with  $5 \times 10^7$  *E. coli* carrying pSEVA:MCR-1 or an empty vector control compared to mock-treated larvae that were injected with PBS. In **(f)**, larvae were pretreated with LPS for 24 hr prior to bacterial infection. Each experiment was performed in triplicate with 10 animals per treatment per replicate, and shaded areas show 95% confidence intervals in survival probability.
