# Supplementary material for: The evolution of colistin resistance increases bacterial resistance to host antimicrobial peptides and virulence
Source: eLife. 2023 Apr 25;12:e84395. doi: 10.7554/eLife.84395 (PMC10129329; doi:10.7554/eLife.84395)
Supplement: Supplementary file 1. [file elife-84395-supp1.xlsx]

## Sheet: Description
Supplementary file 1. List of the physicochemical properties and mechanisms of action of the antimicrobial peptides (AMPs) used in this study.
AMP data	Physicochemical properties and mechanisms of action of AMPs
Variables	Descriptions and references for each AMP property and mechanism of action

## Sheet: AMP data
Name of the AMP	Abbreviation	Sequence	Length	MW	pI	Ala	Cys	Asp	Glu	Phe	Gly	His	Ile	Lys	Leu	Met	Asn	Pro	Gln	Arg	Ser	Thr	Val	Trp	Tyr	Hydrophobicity	NetCharge	Aliphatic_index	Hydropathicity	NoAggrHotspots	TotalHotspotArea	THSA_residue	Disorder (%)	AlphaHelix (%)	BetaStrand (%)	Coil (%)	Polar(%)	nonpolar(%)	Mechanism of action
LL-37 cathelicidin	LL37	LLGDFFRKSKEKIGKEFKRIVQRIKDFLRNLVPRTES	37	4493.34	11.1	0	0	0.0540541	0.0810811	0.108108	0.0540541	0	0.0810811	0.162162	0.108108	0	0.027027	0.027027	0.027027	0.135135	0.0540541	0.027027	0.0540541	0	0	47.79	6	89.46	-0.724	0	0	0	37.83	78.38	0	21.62	56.757	43.243	Disrupts cell membrane (1,2), induces ROS (reactive oxygen species) formation (3,4)
Human beta-defensin-3	HBD3	GIINTLQKYYRVRGGRAVLSLPKEEQIGKSTRGRKRRKK	39	4542.37	12.1	0.025641	0	0	0.0512821	0	0.128205	0	0.0769231	0.153846	0.0769231	0	0.025641	0.025641	0.0512821	0.179487	0.0512821	0.0512821	0.0512821	0	0.0512821	34.48	11	77.44	-1.192	2	3.749	0.096	61.53	38.46	10.26	51.28	56.41	43.59	Disrupts cell membrane (5), inhibits lipid II in peptidoglycan biosynthesis (6)
Cecropin P1	CP1	SWLSKTAKKLENSAKKRISEGIAIAIQGGPR	31	3338.9	11.1	0.129032	0	0	0.0645161	0	0.0967742	0	0.129032	0.16129	0.0645161	0	0.0322581	0.0322581	0.0322581	0.0645161	0.129032	0.0322581	0	0.0322581	0	34.54	5	88.39	-0.558	2	3.546	0.114	83.87	80.65	0	19.35	51.613	48.387	Disrupts cell membrane (7,8)
PR39	PR39	RRRPRPPYLPRPRPPPFFPPRLPPRIPPGFPPRFPPRFP	39	4720.8	13.1	0	0	0	0	0.128205	0.025641	0	0.025641	0	0.0512821	0	0	0.487179	0	0.25641	0	0	0	0	0.025641	47.26	10	30	-1.308	0	0	0	100	0	0	100	25.641	74.359	Inhibits protein and DNA synthesis (8,9), inhibits folate biosynthesis (9)
Protegrin 1	PRO1	RGGRLCYCRRRFCVCVGR	18	2160.68	11	0	0.222222	0	0	0.0555556	0.166667	0	0	0	0.0555556	0	0	0	0	0.333333	0	0	0.111111	0	0.0555556	26.29	5.7	53.89	-0.25	1	3.463	0.192	22.22	0	61.11	38.89	55.5556	66.667	Disrupts cell membrane (10-12)
Prophenin-1	PROPH	AFPPPNVPGPRFPPPNFPGPRFPPPNFPGPRFPPPNFPGPRFPPPNFPGPPFPPPIFPGPWFPPPPPFRPPPFGPPRFP	79	8681.16	13.2	0.0126582	0	0	0	0.189873	0.0886076	0	0.0126582	0	0	0	0.0632911	0.531646	0	0.0759494	0	0	0.0126582	0.0126582	0	62.19	6	9.87	-0.796	0	0	0	100	0	0	100	13.9241	86.07	NA
PMAP-23	PMAP23	RIIDLLWRVRRPQKPKFVTVWVR	23	2962.63	12.7	0	0	0.0434783	0	0.0434783	0	0	0.0869565	0.0869565	0.0869565	0	0	0.0869565	0.0434783	0.217391	0	0.0434783	0.173913	0.0869565	0	56.73	6	118.26	-0.296	2	8.627	0.375	0	0	56.52	43.48	33.333	56.52	Disrupts cell membrane (13)
Chicken cathelicidin-2	CATH2	RFGRFLRKIRRFRPKVTITIQGSARFG	27	3264.92	13.3	0.037037	0	0	0	0.148148	0.111111	0	0.111111	0.0740741	0.037037	0	0	0.037037	0.037037	0.259259	0.037037	0.0740741	0.037037	0	0	42.24	9	72.22	-0.493	1	2.679	0.099	40.74	37.04	22.22	40.74	48.1481	51.85	Disrupts cell membrane (14)
Fowlicidin 3	FOW3	RVKRFWPLVPVAINTVAAGINLYKAIRRK	29	3351.1	12.5	0.137931	0	0	0	0.0344828	0.0344828	0	0.103448	0.103448	0.0689655	0	0.0689655	0.0689655	0	0.137931	0	0.0344828	0.137931	0.0344828	0.0344828	49.28	7	121.03	0.162	1	5.534	0.191	20.68	65.52	0	34.48	34.4828	65.51	Disrupts cell membrane (15)
Colistin	COL	KTKKKLLKKT	10	1215.59	11.2	0	0	0	0	0	0	0	0	0.6	0.2	0	0	0	0	0	0	0.2	0	0	0	8.23	6	78	-1.72	0	0	0	100	60	0	40	80	20	Disrupts cell membrane (16), induces hydroxyl radical production (17)

## Sheet: Variables
Variable name	Description	Reference
Name	Name of AMP
Abbreviation	AMP abbreviation
Sequence	AMP amino acid sequence
Length	AMP length
MW	peptide molecular weight
pI	AMP isoelectric point calculated with Peptide Analyzing Tool (ThermoFisher Scientific)
Ala	Fraction of Ala amino acids (number of Ala amino acids/amino acid length of a given AMP)
Cys	Fraction of Cys amino acids (number of Cys amino acids/amino acid length of a given AMP)
Asp	Fraction of Asp amino acids (number of Asp amino acids/amino acid length of a given AMP)
Glu	Fraction of Glu amino acids (number of Glu amino acids/amino acid length of a given AMP)
Phe	Fraction of Phe amino acids (number of Phe amino acids/amino acid length of a given AMP)
Gly	Fraction of Gly amino acids (number of Gly amino acids/amino acid length of a given AMP)
His	Fraction of His amino acids (number of His amino acids/amino acid length of a given AMP)
Ile	Fraction of Ile amino acids (number of Ile amino acids/amino acid length of a given AMP)
Lys	Fraction of Lys amino acids (number of Lys amino acids/amino acid length of a given AMP)
Leu	Fraction of Leu amino acids (number of Leu amino acids/amino acid length of a given AMP)
Met	Fraction of Met amino acids (number of Met amino acids/amino acid length of a given AMP)
Asn	Fraction of Asn amino acids (number of Asn amino acids/amino acid length of a given AMP)
Pro	Fraction of Pro amino acids (number of Pro amino acids/amino acid length of a given AMP)
Gln	Fraction of Gln amino acids (number of Gln amino acids/amino acid length of a given AMP)
Arg	Fraction of Arg amino acids (number of Arg amino acids/amino acid length of a given AMP)
Ser	Fraction of Ser amino acids (number of Ser amino acids/amino acid length of a given AMP)
Thr	Fraction of Thr amino acids (number of Thr amino acids/amino acid length of a given AMP)
Val	Fraction of Val amino acids (number of Val amino acids/amino acid length of a given AMP)
Trp	Fraction of Trp amino acids (number of Trp amino acids/amino acid length of a given AMP)
Tyr	Fraction of Tyr amino acids (number of Tyr amino acids/amino acid length of a given AMP)
Hydrophobicity	Hydrophobicity calculated with Peptide Analyzing Tool (ThermoFisher Scientific)
NetCharge	Net charge calculated with Peptide property calculator (PepCalc.com) Innovagen
Aliphatic_index	Relative volume occupied by aliphatic side chains, which is an indicator of protein termostability	Gasteiger E., Hoogland C., Gattiker A., Duvaud S., Wilkins M.R., Appel R.D., Bairoch A.; Protein Identification and Analysis Tools on the ExPASy Server;
Hydropathicity	Grand average of hydropathicity index indicates the solubility of the proteins: positive GRAVY (hydrophobic), negative GRAVY (hydrophilic)	Gasteiger E., Hoogland C., Gattiker A., Duvaud S., Wilkins M.R., Appel R.D., Bairoch A.; Protein Identification and Analysis Tools on the ExPASy Server;
NoAggrHotspots	predicted number of aggregation prone hotspots calculated by AggreScan	O. Conchillo-Solé et al. AGGRESCAN: A server for the prediction and evaluation of “hot spots” of aggregation in polypeptides. BMC Bioinformatics 8, 65 (2007).
TotalHotspotArea	predicted total area of aggregation hotspots by AggreScan	O. Conchillo-Solé et al. AGGRESCAN: A server for the prediction and evaluation of “hot spots” of aggregation in polypeptides. BMC Bioinformatics 8, 65 (2007).
THSA_residue	predicted area of aggregation hotspots per residue (length) by AggreScan	O. Conchillo-Solé et al. AGGRESCAN: A server for the prediction and evaluation of “hot spots” of aggregation in polypeptides. BMC Bioinformatics 8, 65 (2007).
Disorder	Percentage of disordered regions calculated with Pasta 2.0
AlphaHelix	Percentage of alpha-helical regions calculated with Pasta 2.0
BetaStrand	Percentage of beta-strand regions calculated with Pasta 2.0
Coil	Percentage of coiled structure calculated with Pasta 2.0
Polar	Fraction of polar amino acids (%) (number of polar amino acids/amino acid length of a given AMP)
NonPolar	Fraction of non polar amino acids (%) (number of non polar amino acids/amino acid length of a given AMP)
Mechanism of action	Mechanism of action of AMPs
	References
	1	Lee, CC et al. Transmembrane pores formed by human antimicrobial peptide LL-37. Biophys. J. 100, 1688–1696 (2011).
	2	D, Xhindoli et al. The human cathelicidin LL-37–A pore-forming antibacterial peptide and host-cell modulator. Biochim. Biophys. Acta 1858, 546–566 (2016).
	3	Liu, W. et al. Effect of Intracellular Expression of Antimicrobial Peptide LL-37 on Growth of Escherichia coli Strain TOP10 under Aerobic and Anaerobic Conditions. Antimicrob. Agents Chemother. 57, 4707–4716 (2013).
	4	Choi, H et al. Oxidative stress induced in E. coli by the human antimicrobial peptide LL-37. PLOS Pathog. 13, e1006481 (2017).
	5	Dhople, V et al. The human beta-defensin-3, an antibacterial peptide with multiple biological functions. Biochim. Biophys. Acta - Biomembr. 1758, 1499–1512 (2006).
	6	Sass, V. et al. Human -Defensin 3 Inhibits Cell Wall Biosynthesis in Staphylococci. Infect. Immun. 78, 2793–2800 (2010).
	7	Arcidiacono, S et al. Membrane permeability and antimicrobial kinetics of cecropin P1 against Escherichia coli. J. Pept. Sci. 15, 398–403 (2009).
	8	Boman, HG et al. Mechanisms of action on Escherichia coli of cecropin P1 and PR-39, two antibacterial peptides from pig intestine. Infect. Immun. 61, 2978–84 (1993).
	9	Ho, YH et al. Systematic Analysis of Intracellular-targeting Antimicrobial Peptides, Bactenecin 7, Hybrid of Pleurocidin and Dermaseptin, Proline–Arginine-rich Peptide, and Lactoferricin B, by Using Escherichia coli Proteome Microarrays. Mol. Cell. Proteomics 15, 1837–1847 (2016).
	10	Sokolov, Y et al. Membrane channel formation by antimicrobial protegrins. Biochimica et Biophysica Acta (BBA) - Biomembranes 1420, 23-29, (1999).
	11	Capone, R. et al. Antimicrobial Protegrin-1 Forms Ion Channels: Molecular Dynamic Simulation, Atomic Force Microscopy, and Electrical Conductance Studies. Biophysical Journal. 98, 2644-2652, (2010).
	12	Bolintineanu, D et al. Antimicrobial mechanism of pore-forming protegrin peptides: 100 pores to kill E. coli. Peptides 31, 1-8, (2010).
	13	B. Orioni et al., Membrane perturbation by the antimicrobial peptide PMAP-23: A fluorescence and molecular dynamics study. Biochim. Biophys. Acta. 1788, 1523–1533 (2009).
	14	Scheenstra MR et al. Cathelicidins PMAP-36, LL-37 and CATH-2 are similar peptides with different modes of action. Sci Rep9, 4780 (2019).
	15	Qu, P. et al. The central hinge link truncation of the antimicrobial peptide Fowlicidin-3 enhances its cell selectivity without antibacterial activity loss. Antimicrob Agents Chemother 60, 2798–2806, (2016)
	16	Sabnis, A. et al. Colistin kills bacteria by targeting lipopolysaccharide in the cytoplasmic membrane. Elife 2021
	17	Sampson TR et al. Rapid killing of Acinetobacter baumannii by polymyxins is mediated by a hydroxyl radical death pathway. Antimicrobial Agents and Chemotherapy. 56, 5642–5649 (2012)
