# Supplementary material for: The evolution of colistin resistance increases bacterial resistance to host antimicrobial peptides and virulence
Source: eLife. 2023 Apr 25;12:e84395. doi: 10.7554/eLife.84395 (PMC10129329; doi:10.7554/eLife.84395)
Supplement: Supplementary file 2. [file elife-84395-supp2.xlsx]

## Sheet: Fitness data
Supplementary file 2	Relative fitness of E.coli strain carrying pSEVA:MCR-1.
AMP	Relative fitness	relative fitness effect (%)	Replicate
COL 0	0.976142	-2.3858	1
COL 0	0.971075	-2.89247	2
COL 0	0.973584	-2.64159	3
COL 0	0.985811	-1.4189	4
COL 0	0.971306	-2.86936	5
COL 0	0.969746	-3.02543	6
COL 1/8	0.977547	-2.2453	1
COL 1/8	0.978223	-2.17769	2
COL 1/8	0.978399	-2.16015	3
COL 1/8	0.973831	-2.61689	4
COL 1/8	0.973432	-2.65682	5
COL 1/8	0.97151	-2.84903	6
COL 1/4	1.02923	2.92326	1
COL 1/4	1.03364	3.3636	2
COL 1/4	1.04632	4.63196	3
COL 1/4	1.03395	3.39507	4
COL 1/4	1.03066	3.06636	5
COL 1/4	1.03709	3.70886	6
COL 1/2	1.29805	29.8053	1
COL 1/2	1.38528	38.5278	2
COL 1/2	1.41334	41.3345	3
COL 1/2	1.41065	41.0651	4
COL 1/2	1.37844	37.8439	5
COL 1/2	1.38242	38.2419	6
CP1 0	0.978164	-2.18356	1
CP1 0	0.9678	-3.22002	2
CP1 0	0.96316	-3.68398	3
CP1 0	0.963793	-3.6207	4
CP1 0	0.970096	-2.99035	5
CP1 0	0.962618	-3.7382	6
CP1 1/8	0.977923	-2.20768	1
CP1 1/8	0.961506	-3.84942	2
CP1 1/8	0.972834	-2.71665	3
CP1 1/8	0.968767	-3.12332	4
CP1 1/8	0.968668	-3.13316	5
CP1 1/8	0.963659	-3.6341	6
CP1 1/4	0.985548	-1.44524	1
CP1 1/4	1.00635	0.63454	2
CP1 1/4	1.00425	0.425161	3
CP1 1/4	0.993532	-0.646802	4
CP1 1/4	0.987683	-1.23173	5
CP1 1/4	0.990262	-0.9738	6
CP1 1/2	1.05117	5.11682	1
CP1 1/2	1.04902	4.90206	2
CP1 1/2	1.05721	5.72096	3
CP1 1/2	1.05602	5.60194	4
CP1 1/2	1.08662	8.66241	5
CP1 1/2	1.05514	5.51437	6
LL37 0	0.96673	-3.32697	1
LL37 0	0.975239	-2.47611	2
LL37 0	0.968743	-3.12568	3
LL37 0	0.971749	-2.82508	4
LL37 0	0.970355	-2.96454	5
LL37 0	0.965389	-3.46111	6
LL37 1/8	0.968182	-3.18181	1
LL37 1/8	0.973277	-2.67235	2
LL37 1/8	0.968693	-3.13074	3
LL37 1/8	0.967609	-3.23915	4
LL37 1/8	0.964027	-3.59734	5
LL37 1/8	0.970282	-2.97177	6
LL37 1/4	0.981666	-1.83338	1
LL37 1/4	0.975283	-2.47173	2
LL37 1/4	0.989353	-1.06475	3
LL37 1/4	0.969905	-3.00948	4
LL37 1/4	0.978797	-2.12027	5
LL37 1/4	0.982981	-1.7019	6
LL37 1/2	1.10789	10.7895	1
LL37 1/2	1.09864	9.86448	2
LL37 1/2	1.11164	11.1642	3
LL37 1/2	1.08525	8.52481	4
LL37 1/2	1.1069	10.6905	5
LL37 1/2	1.12018	12.0179	6
PRO1 0	0.986728	-1.32724	1
PRO1 0	0.978925	-2.10752	2
PRO1 0	0.981301	-1.86989	3
PRO1 0	0.974544	-2.54558	4
PRO1 0	0.974629	-2.53708	5
PRO1 0	0.972409	-2.75905	6
PRO1 1/8	0.976852	-2.31485	1
PRO1 1/8	0.986826	-1.31741	2
PRO1 1/8	0.974113	-2.58875	3
PRO1 1/8	0.978014	-2.19863	4
PRO1 1/8	0.980412	-1.95878	5
PRO1 1/8	0.981493	-1.85073	6
PRO1 1/4	0.990737	-0.926268	1
PRO1 1/4	0.99494	-0.506015	2
PRO1 1/4	0.991472	-0.852796	3
PRO1 1/4	0.986254	-1.37464	4
PRO1 1/4	0.988707	-1.12929	5
PRO1 1/4	0.979934	-2.00664	6
PRO1 1/2	1.02103	2.10266	1
PRO1 1/2	1.01337	1.33685	2
PRO1 1/2	1.04427	4.42743	3
PRO1 1/2	1.02507	2.50728	4
PRO1 1/2	1.03851	3.85148	5
PRO1 1/2	1.05496	5.49559	6
PMAP23 0	0.965226	-3.47736	1
PMAP23 0	0.959948	-4.0052	2
PMAP23 0	0.943478	-5.65221	3
PMAP23 0	0.946535	-5.34654	4
PMAP23 0	0.938972	-6.10284	5
PMAP23 0	0.932746	-6.72542	6
PMAP23 1/8	0.954424	-4.55764	1
PMAP23 1/8	0.92372	-7.628	2
PMAP23 1/8	0.959226	-4.07745	3
PMAP23 1/8	0.948957	-5.10431	4
PMAP23 1/8	0.966092	-3.39076	5
PMAP23 1/8	0.961412	-3.85878	6
PMAP23 1/4	0.979951	-2.0049	1
PMAP23 1/4	0.990989	-0.901146	2
PMAP23 1/4	0.978131	-2.18685	3
PMAP23 1/4	0.998182	-0.181803	4
PMAP23 1/4	0.992464	-0.753562	5
PMAP23 1/4	1.00244	0.243994	6
PMAP23 1/2	1.12689	12.6887	1
PMAP23 1/2	1.2247	22.4699	2
PMAP23 1/2	1.1696	16.9601	3
PMAP23 1/2	1.18035	18.0354	4
PMAP23 1/2	1.1355	13.5499	5
PMAP23 1/2	1.12276	12.2763	6
CATH2 0	0.972611	-2.73888	1
CATH2 0	0.981791	-1.82089	2
CATH2 0	0.979688	-2.03118	3
CATH2 0	0.978877	-2.11225	4
CATH2 0	0.98679	-1.32103	5
CATH2 0	0.967465	-3.25352	6
CATH2 1/8	0.995467	-0.453268	1
CATH2 1/8	0.987588	-1.24121	2
CATH2 1/8	0.98495	-1.50497	3
CATH2 1/8	0.987181	-1.2819	4
CATH2 1/8	0.98057	-1.94302	5
CATH2 1/8	0.980365	-1.96348	6
CATH2 1/4	1.07286	7.28617	1
CATH2 1/4	1.08565	8.56516	2
CATH2 1/4	1.08911	8.91141	3
CATH2 1/4	1.09031	9.03128	4
CATH2 1/4	1.02094	2.09377	5
CATH2 1/4	1.04586	4.58617	6
CATH2 1/2	1.18387	18.3868	1
CATH2 1/2	1.14948	14.9483	2
CATH2 1/2	1.15584	15.584	3
CATH2 1/2	1.25129	25.129	4
CATH2 1/2	1.15154	15.1543	5
CATH2 1/2	1.10469	10.4691	6
