# Supplementary material for: The evolution of colistin resistance increases bacterial resistance to host antimicrobial peptides and virulence
Source: eLife. 2023 Apr 25;12:e84395. doi: 10.7554/eLife.84395 (PMC10129329; doi:10.7554/eLife.84395)
Supplement: Supplementary file 3. [file elife-84395-supp3.xlsx]

## Sheet: FC
Supplementary file 3	Relative change in MIC of AMPs
Plasmid	AMP	relative fold change	MCR gene
PN16 (IncI2)	LL37	2	MCR-1
PN21 (IncI2)	LL37	2.25	MCR-1
PN42 (IncX4)	LL37	1.5	MCR-1
pSEVA:MCR-1	LL37	1.5	MCR-1
PN16 (IncI2)	HBD3	1.5	MCR-1
PN21 (IncI2)	HBD3	1.5	MCR-1
PN42 (IncX4)	HBD3	1.2	MCR-1
pSEVA:MCR-1	HBD3	1	MCR-1
PN16 (IncI2)	CP1	1.5	MCR-1
PN21 (IncI2)	CP1	5.91	MCR-1
PN42 (IncX4)	CP1	1.5	MCR-1
pSEVA:MCR-1	CP1	2.63	MCR-1
PN16 (IncI2)	PR39	0.66	MCR-1
PN21 (IncI2)	PR39	0.66	MCR-1
PN42 (IncX4)	PR39	0.66	MCR-1
pSEVA:MCR-1	PR39	0.66	MCR-1
PN16 (IncI2)	PRO1	2.38	MCR-1
PN21 (IncI2)	PRO1	1.75	MCR-1
PN42 (IncX4)	PRO1	2.38	MCR-1
pSEVA:MCR-1	PRO1	1	MCR-1
PN16 (IncI2)	PROPH	0.66	MCR-1
PN21 (IncI2)	PROPH	1	MCR-1
PN42 (IncX4)	PROPH	0.66	MCR-1
pSEVA:MCR-1	PROPH	1	MCR-1
PN16 (IncI2)	PMAP23	1.75	MCR-1
PN21 (IncI2)	PMAP23	2.25	MCR-1
PN42 (IncX4)	PMAP23	1	MCR-1
pSEVA:MCR-1	PMAP23	1.5	MCR-1
PN16 (IncI2)	CATH2	3.38	MCR-1
PN21 (IncI2)	CATH2	3.38	MCR-1
PN42 (IncX4)	CATH2	1.58	MCR-1
pSEVA:MCR-1	CATH2	1.053	MCR-1
PN16 (IncI2)	FOW3	2.25	MCR-1
PN21 (IncI2)	FOW3	2.25	MCR-1
PN42 (IncX4)	FOW3	2.38	MCR-1
pSEVA:MCR-1	FOW3	1.17	MCR-1
WJ1 (IncHI2)	PMAP23	1.5	MCR-3
481 (IncP1)	PMAP23	1.5	MCR-3
WJ1 (IncHI2)	FOW3	1.5	MCR-3
481 (IncP1)	FOW3	1.5	MCR-3
WJ1 (IncHI2)	CP1	3.38	MCR-3
481 (IncP1)	CP1	2.25	MCR-3
WJ1 (IncHI2)	PR39	1	MCR-3
481 (IncP1)	PR39	0.66	MCR-3
WJ1 (IncHI2)	HBD3	1.5	MCR-3
481 (IncP1)	HBD3	1.5	MCR-3
WJ1 (IncHI2)	CATH2	1.33	MCR-3
481 (IncP1)	CATH2	1.83	MCR-3
WJ1 (IncHI2)	PROPH	1	MCR-3
481 (IncP1)	PROPH	1	MCR-3
WJ1 (IncHI2)	PRO1	1.33	MCR-3
481 (IncP1)	PRO1	1.17	MCR-3
WJ1 (IncHI2)	LL37	1.5	MCR-3
481 (IncP1)	LL37	1	MCR-3
PN23 (IncX4)	LL37	1.17	MCR-1
PN23 (IncX4)	HBD3	1	MCR-1
PN23 (IncX4)	CP1	3.37	MCR-1
PN23 (IncX4)	PR39	1.5	MCR-1
PN23 (IncX4)	PRO1	1	MCR-1
PN23 (IncX4)	PROPH	1.33	MCR-1
PN23 (IncX4)	PMAP23	1.75	MCR-1
PN23 (IncX4)	CATH2	1.5	MCR-1
PN23 (IncX4)	FOW3	2	MCR-1
PN16 (IncI2)	COL	17.08	MCR-1
PN21 (IncI2)	COL	11.39	MCR-1
PN23 (IncX4)	COL	22.78	MCR-1
PN42 (IncX4)	COL	17.08	MCR-1
pSEVA:MCR-1	COL	13.28	MCR-1
WJ1 (IncHI2)	COL	15.18	MCR-3
481 (IncP1)	COL	13.29	MCR-3

## Sheet: raw MIC values
	1	2	3	4	5	6	7	8	9	10	11	12
A	0.044	0.04	0.041	0.041	0.04	0.041	0.041	0.04	0.041	0.041	0.044	0.044	medium only
B	0.041	0.572	0.555	0.552	0.552	0.556	0.553	0.168	0.043	0.043	0.044	0.04	J53 control
C	0.042	0.574	0.55	0.553	0.557	0.568	0.572	0.073	0.043	0.042	0.04	0.041
D	0.041	0.574	0.557	0.557	0.558	0.561	0.569	0.042	0.043	0.043	0.04	0.04
E	0.04	0.603	0.542	0.554	0.557	0.563	0.575	0.526	0.242	0.043	0.067	0.04	PN16
F	0.04	0.608	0.545	0.554	0.557	0.562	0.566	0.459	0.398	0.043	0.045	0.04
G	0.041	0.609	0.552	0.559	0.557	0.562	0.571	0.579	0.387	0.047	0.054	0.04
H	0.044	0.04	0.04	0.041	0.04	0.04	0.04	0.04	0.034	0.034	0.043	0.044	medium only
		0	3.12148	4.68221	7.02332	10.535	15.8025	23.7037	35.5556	53.3333	80		LL37 ug/ml
	1	2	3	4	5	6	7	8	9	10	11	12
A	0.038	0.042	0.041	0.043	0.041	0.041	0.041	0.04	0.042	0.041	0.043	0.039	medium only
B	0.037	0.64	0.535	0.603	0.611	0.603	0.433	0.042	0.043	0.044	0.042	0.038	J53 control
C	0.037	0.639	0.63	0.607	0.614	0.611	0.46	0.043	0.043	0.043	0.043	0.037
D	0.037	0.64	0.615	0.594	0.605	0.607	0.407	0.043	0.043	0.044	0.043	0.037
E	0.037	0.634	0.602	0.583	0.601	0.58	0.591	0.356	0.38	0.041	0.041	0.038	PN21
F	0.038	0.6	0.591	0.584	0.584	0.581	0.523	0.47	0.356	0.041	0.04	0.038
G	0.038	0.605	0.523	0.578	0.583	0.574	0.521	0.283	0.268	0.042	0.041	0.037
H	0.038	0.041	0.041	0.04	0.04	0.04	0.041	0.04	0.042	0.041	0.044	0.038	medium only
		0	3.12148	4.68221	7.02332	10.535	15.8025	23.7037	35.5556	53.3333	80		LL37 ug/ml
	1	2	3	4	5	6	7	8	9	10	11	12
A	0.039	0.041	0.044	0.046	0.042	0.046	0.046	0.04	0.051	0.045	0.043	0.038	medium only
B	0.038	0.602	0.575	0.577	0.582	0.578	0.56	0.043	0.042	0.043	0.041	0.038	J53 control
C	0.039	0.605	0.578	0.582	0.581	0.58	0.582	0.043	0.043	0.042	0.042	0.039
D	0.038	0.602	0.568	0.576	0.574	0.577	0.574	0.072	0.043	0.042	0.042	0.037
E	0.037	0.635	0.581	0.577	0.576	0.573	0.581	0.583	0.042	0.041	0.041	0.037	PN42
F	0.037	0.626	0.572	0.577	0.576	0.573	0.574	0.641	0.044	0.041	0.041	0.037
G	0.038	0.627	0.588	0.58	0.583	0.577	0.578	0.303	0.042	0.041	0.042	0.038
H	0.038	0.042	0.042	0.042	0.041	0.045	0.043	0.043	0.046	0.043	0.044	0.055	medium only
		0	3.12148	4.68221	7.02332	10.535	15.8025	23.7037	35.5556	53.3333	80		LL37 ug/ml
	1	2	3	4	5	6	7	8	9	10	11	12
A	0.041	0.04	0.04	0.041	0.04	0.047	0.04	0.041	0.041	0.041	0.043	0.043	medium only
B	0.042	0.612	0.575	0.585	0.583	0.594	0.406	0.044	0.042	0.043	0.041	0.04	Pseva EV control
C	0.041	0.618	0.598	0.577	0.571	0.591	0.435	0.042	0.048	0.043	0.042	0.04
D	0.041	0.621	0.566	0.566	0.563	0.582	0.444	0.042	0.042	0.042	0.042	0.04
E	0.043	0.636	0.555	0.566	0.573	0.581	0.518	0.092	0.042	0.043	0.042	0.041	pSEVA:MCR-1
F	0.041	0.645	0.582	0.589	0.559	0.589	0.54	0.143	0.045	0.042	0.041	0.043
G	0.043	0.643	0.568	0.59	0.586	0.586	0.54	0.347	0.043	0.043	0.042	0.04
H	0.041	0.04	0.04	0.04	0.04	0.04	0.041	0.041	0.042	0.041	0.044	0.05	medium only
		0	3.12148	4.68221	7.02332	10.535	15.8025	23.7037	35.5556	53.3333	80		LL37 ug/ml
	1	2	3	4	5	6	7	8	9	10	11	12
A	0.038	0.039	0.04	0.04	0.039	0.04	0.04	0.039	0.04	0.04	0.043	0.037	medium only
B	0.037	0.588	0.581	0.58	0.579	0.582	0.407	0.563	0.481	0.27	0.045	0.038	J53 control
C	0.039	0.591	0.587	0.582	0.584	0.588	0.589	0.56	0.488	0.26	0.055	0.04
D	0.038	0.583	0.583	0.577	0.565	0.573	0.573	0.551	0.463	0.194	0.033	0.037
E	0.037	0.738	0.61	0.59	0.593	0.6	0.605	0.6	0.586	0.499	0.316	0.037	PN16
F	0.037	0.685	0.602	0.597	0.594	0.597	0.602	0.593	0.569	0.477	0.308	0.037
G	0.038	0.718	0.612	0.606	0.597	0.606	0.607	0.598	0.577	0.49	0.288	0.038
H	0.037	0.04	0.039	0.041	0.04	0.039	0.039	0.04	0.039	0.041	0.043	0.039	medium only
		0	11.7055	17.5583	26.3374	39.5062	59.2593	88.8889	133.333	200	300		HBD3 ug/ml
	1	2	3	4	5	6	7	8	9	10	11	12
A	0.038	0.039	0.04	0.041	0.04	0.039	0.039	0.039	0.04	0.039	0.043	0.038	medium only
B	0.037	0.605	0.593	0.59	0.591	0.597	0.593	0.549	0.462	0.221	0.067	0.038	J53 control
C	0.037	0.603	0.607	0.604	0.605	0.598	0.59	0.551	0.455	0.231	0.067	0.037
D	0.037	0.596	0.592	0.594	0.586	0.581	0.579	0.536	0.432	0.222	0.068	0.037
E	0.037	0.603	0.595	0.58	0.577	0.559	0.563	0.551	0.545	0.373	0.22	0.037	PN21
F	0.038	0.601	0.584	0.579	0.576	0.554	0.558	0.549	0.539	0.378	0.14	0.038
G	0.037	0.601	0.592	0.58	0.576	0.556	0.564	0.549	0.533	0.374	0.113	0.037
H	0.038	0.039	0.04	0.039	0.039	0.04	0.04	0.039	0.04	0.04	0.043	0.037	medium only
		0	11.7055	17.5583	26.3374	39.5062	59.2593	88.8889	133.333	200	300		HBD3 ug/ml
	1	2	3	4	5	6	7	8	9	10	11	12
A	0.038	0.04	0.041	0.042	0.043	0.044	0.048	0.042	0.043	0.042	0.04	0.042	medium only
B	0.508	0.479	0.47	0.456	0.478	0.479	0.477	0.492	0.317	0.195	0.116	0.043	J53 control
C	0.51	0.478	0.478	0.464	0.481	0.488	0.48	0.5	0.321	0.198	0.073	0.043
D	0.501	0.485	0.476	0.464	0.493	0.486	0.49	0.502	0.315	0.208	0.069	0.038
E	0.53	0.511	0.501	0.482	0.505	0.502	0.511	0.563	0.345	0.246	0.214	0.041	PN42
F	0.522	0.494	0.499	0.487	0.5	0.496	0.512	0.563	0.335	0.238	0.202	0.049
G	0.513	0.51	0.498	0.491	0.485	0.477	0.497	0.555	0.345	0.245	0.166	0.047
H	0.038	0.039	0.039	0.038	0.039	0.038	0.039	0.038	0.038	0.04	0.038	0.043	medium only
	0	58.142	69.7704	83.7245	100.469	120.563	144.676	173.611	208.333	250	300		HBD3 ug/ml
	1	2	3	4	5	6	7	8	9	10	11	12
A	0.043	0.04	0.04	0.041	0.039	0.04	0.041	0.041	0.04	0.041	0.043	0.041	medium only
B	0.041	0.614	0.585	0.575	0.571	0.583	0.576	0.569	0.544	0.385	0.179	0.04	Pseva EV control
C	0.042	0.609	0.589	0.585	0.596	0.603	0.578	0.572	0.548	0.385	0.187	0.041
D	0.042	0.621	0.595	0.578	0.591	0.585	0.589	0.563	0.533	0.394	0.165	0.04
E	0.041	0.612	0.587	0.579	0.582	0.579	0.587	0.565	0.548	0.379	0.198	0.043	pSEVA:MCR-1
F	0.04	0.627	0.587	0.584	0.583	0.591	0.584	0.571	0.543	0.387	0.192	0.041
G	0.041	0.616	0.595	0.593	0.585	0.596	0.586	0.57	0.548	0.396	0.199	0.041
H	0.04	0.041	0.04	0.041	0.04	0.04	0.041	0.04	0.04	0.041	0.043	0.041	medium only
		0	69.7704	83.7245	100.469	120.563	144.676	173.611	208.333	250	300		HBD3 ug/ml
	1	2	3	4	5	6	7	8	9	10	11	12
A	0.044	0.04	0.04	0.041	0.04	0.04	0.04	0.04	0.04	0.04	0.043	0.044	medium only
B	0.041	0.564	0.372	0.136	0.041	0.041	0.04	0.04	0.04	0.04	0.038	0.04	J53 control
C	0.04	0.574	0.439	0.412	0.041	0.041	0.04	0.041	0.04	0.04	0.039	0.04
D	0.04	0.565	0.329	0.168	0.041	0.041	0.041	0.04	0.04	0.04	0.039	0.04
E	0.04	0.673	0.573	0.58	0.491	0.041	0.043	0.04	0.04	0.04	0.039	0.04	PN16
F	0.041	0.668	0.563	0.584	0.46	0.04	0.041	0.041	0.04	0.04	0.039	0.041
G	0.041	0.646	0.565	0.582	0.473	0.042	0.041	0.041	0.041	0.041	0.04	0.039
H	0.044	0.045	0.04	0.04	0.04	0.04	0.041	0.04	0.041	0.04	0.043	0.045	medium only
		0	1.36565	2.04847	3.0727	4.60905	6.91358	10.3704	15.5556	23.3333	35		CP1 ug/ml
	1	2	3	4	5	6	7	8	9	10	11	12
A	0.044	0.04	0.041	0.041	0.04	0.04	0.042	0.039	0.039	0.035	0.043	0.044	medium only
B	0.041	0.586	0.352	0.241	0.043	0.062	0.041	0.041	0.041	0.04	0.039	0.04	J53 control
C	0.043	0.591	0.413	0.167	0.042	0.043	0.041	0.041	0.041	0.04	0.039	0.041
D	0.041	0.605	0.572	0.25	0.041	0.041	0.041	0.076	0.041	0.041	0.039	0.042
E	0.041	0.601	0.538	0.553	0.557	0.417	0.242	0.148	0.042	0.04	0.057	0.04	PN21
F	0.041	0.577	0.522	0.512	0.5	0.498	0.215	0.166	0.04	0.04	0.039	0.04
G	0.041	0.58	0.534	0.236	0.468	0.42	0.341	0.174	0.104	0.04	0.039	0.041
H	0.044	0.041	0.04	0.041	0.04	0.039	0.04	0.04	0.035	0.035	0.043	0.045	medium only
		0	1.36565	2.04847	3.0727	4.60905	6.91358	10.3704	15.5556	23.3333	35		CP1 ug/ml
	1	2	3	4	5	6	7	8	9	10	11	12
A	0.045	0.041	0.04	0.041	0.05	0.04	0.04	0.04	0.04	0.04	0.043	0.044	medium only
B	0.041	0.585	0.518	0.226	0.045	0.042	0.041	0.04	0.04	0.04	0.04	0.04	Pseva EV control
C	0.04	0.589	0.569	0.196	0.041	0.04	0.04	0.043	0.04	0.04	0.04	0.04
D	0.04	0.597	0.561	0.21	0.043	0.041	0.04	0.041	0.04	0.041	0.04	0.04
E	0.04	0.595	0.558	0.564	0.259	0.155	0.123	0.047	0.041	0.041	0.08	0.04	pSEVA:MCR-1
F	0.041	0.582	0.557	0.565	0.281	0.154	0.041	0.041	0.06	0.055	0.041	0.041
G	0.04	0.592	0.548	0.556	0.175	0.137	0.06	0.041	0.041	0.041	0.045	0.035
H	0.044	0.04	0.041	0.04	0.04	0.04	0.042	0.04	0.041	0.041	0.043	0.046	medium only
		0	1.36565	2.04847	3.0727	4.60905	6.91358	10.3704	15.5556	23.3333	35		CP1 ug/ml
	1	2	3	4	5	6	7	8	9	10	11	12
A	0.038	0.039	0.04	0.04	0.04	0.039	0.039	0.039	0.04	0.04	0.043	0.044	medium only
B	0.037	0.57	0.584	0.553	0.57	0.575	0.359	0.16	0.045	0.041	0.041	0.038	J53 control
C	0.037	0.574	0.602	0.591	0.58	0.577	0.347	0.143	0.045	0.041	0.04	0.036
D	0.037	0.573	0.588	0.578	0.576	0.568	0.35	0.152	0.044	0.042	0.04	0.037
E	0.037	0.765	0.61	0.594	0.576	0.668	0.327	0.042	0.041	0.042	0.042	0.038	PN16
F	0.038	0.685	0.595	0.584	0.567	0.592	0.32	0.042	0.041	0.044	0.041	0.038
G	0.038	0.701	0.607	0.584	0.582	0.628	0.308	0.044	0.042	0.042	0.042	0.036
H	0.042	0.039	0.04	0.04	0.039	0.039	0.04	0.04	0.04	0.039	0.043	0.037	medium only
		0	1.17055	1.75583	2.63374	3.95062	5.92593	8.88889	13.3333	20	30		PR39 ug/ml
	1	2	3	4	5	6	7	8	9	10	11	12
A	0.064	0.04	0.04	0.043	0.039	0.04	0.042	0.04	0.043	0.046	0.043	0.038	medium only
B	0.039	0.592	0.57	0.566	0.566	0.564	0.451	0.227	0.045	0.042	0.041	0.037	J53 control
C	0.039	0.594	0.57	0.564	0.571	0.565	0.445	0.225	0.045	0.042	0.041	0.038
D	0.039	0.597	0.568	0.569	0.573	0.572	0.444	0.219	0.046	0.042	0.041	0.038
E	0.037	0.579	0.566	0.546	0.547	0.565	0.515	0.079	0.043	0.042	0.041	0.038	PN21
F	0.037	0.566	0.554	0.554	0.553	0.571	0.512	0.077	0.043	0.042	0.04	0.037
G	0.038	0.576	0.564	0.55	0.553	0.577	0.496	0.06	0.044	0.042	0.04	0.038
H	0.038	0.04	0.039	0.041	0.04	0.04	0.04	0.039	0.039	0.04	0.043	0.039	medium only
		0	1.17055	1.75583	2.63374	3.95062	5.92593	8.88889	13.3333	20	30		PR39 ug/ml
	1	2	3	4	5	6	7	8	9	10	11	12
A	0.038	0.04	0.04	0.041	0.04	0.04	0.04	0.04	0.04	0.04	0.043	0.038	medium only
B	0.038	0.588	0.583	0.575	0.581	0.569	0.358	0.142	0.045	0.042	0.042	0.037	J53 control
C	0.037	0.594	0.591	0.586	0.584	0.575	0.358	0.167	0.045	0.041	0.043	0.036
D	0.038	0.582	0.588	0.579	0.577	0.573	0.338	0.167	0.045	0.042	0.041	0.037
E	0.038	0.596	0.603	0.592	0.587	0.58	0.315	0.078	0.043	0.041	0.041	0.037	PN42
F	0.038	0.591	0.585	0.584	0.577	0.573	0.214	0.078	0.043	0.04	0.04	0.039
G	0.038	0.599	0.597	0.595	0.587	0.582	0.359	0.085	0.043	0.043	0.042	0.037
H	0.043	0.04	0.04	0.04	0.039	0.039	0.041	0.039	0.04	0.04	0.043	0.038	medium only
		0	1.17055	1.75583	2.63374	3.95062	5.92593	8.88889	13.3333	20	30		PR39 ug/ml
	1	2	3	4	5	6	7	8	9	10	11	12
A	0.042	0.04	0.04	0.041	0.039	0.04	0.041	0.039	0.04	0.04	0.043	0.041	medium only
B	0.041	0.586	0.581	0.55	0.576	0.564	0.36	0.168	0.045	0.042	0.041	0.041	Pseva EV control
C	0.042	0.594	0.595	0.576	0.592	0.566	0.372	0.174	0.045	0.044	0.043	0.042
D	0.041	0.591	0.581	0.569	0.581	0.561	0.351	0.152	0.045	0.042	0.04	0.041
E	0.04	0.594	0.576	0.578	0.574	0.563	0.33	0.061	0.044	0.042	0.04	0.042	pSEVA:MCR-1
F	0.04	0.6	0.584	0.568	0.575	0.55	0.315	0.048	0.045	0.042	0.04	0.04
G	0.041	0.602	0.596	0.558	0.575	0.542	0.318	0.074	0.045	0.042	0.04	0.042
H	0.041	0.041	0.039	0.04	0.04	0.04	0.04	0.039	0.04	0.04	0.043	0.043	medium only
		0	1.17055	1.75583	2.63374	3.95062	5.92593	8.88889	13.3333	20	30		PR39 ug/ml
	1	2	3	4	5	6	7	8	9	10	11	12
A	0.041	0.041	0.04	0.042	0.041	0.04	0.04	0.04	0.041	0.04	0.043	0.04	medium only
B	0.041	0.588	0.595	0.592	0.551	0.25	0.077	0.041	0.043	0.041	0.039	0.04	J53 control
C	0.041	0.584	0.604	0.598	0.58	0.304	0.072	0.041	0.041	0.042	0.039	0.039
D	0.041	0.593	0.597	0.598	0.581	0.324	0.133	0.042	0.041	0.041	0.039	0.04
E	0.041	0.674	0.617	0.615	0.632	0.646	0.59	0.302	0.042	0.042	0.039	0.042	PN16
F	0.041	0.685	0.619	0.628	0.637	0.642	0.593	0.294	0.295	0.043	0.045	0.041
G	0.041	0.674	0.615	0.605	0.605	0.605	0.598	0.341	0.044	0.04	0.041	0.04
H	0.041	0.04	0.04	0.039	0.039	0.039	0.04	0.039	0.039	0.04	0.043	0.041	medium only
		0	0.312148	0.468221	0.702332	1.0535	1.58025	2.37037	3.55556	5.33333	8		PRO1 ug/ml
	1	2	3	4	5	6	7	8	9	10	11	12
A	0.041	0.042	0.041	0.044	0.04	0.04	0.041	0.039	0.04	0.039	0.043	0.041	medium only
B	0.04	0.574	0.575	0.574	0.476	0.255	0.062	0.058	0.049	0.046	0.039	0.043	J53 control
C	0.052	0.583	0.583	0.587	0.5	0.212	0.131	0.045	0.049	0.052	0.039	0.041
D	0.044	0.589	0.572	0.591	0.508	0.266	0.139	0.06	0.053	0.043	0.04	0.04
E	0.045	0.573	0.598	0.597	0.568	0.529	0.326	0.101	0.059	0.042	0.041	0.04	PN21
F	0.042	0.582	0.575	0.567	0.594	0.526	0.407	0.112	0.042	0.067	0.061	0.04
G	0.044	0.584	0.598	0.562	0.573	0.538	0.454	0.217	0.054	0.097	0.041	0.041
H	0.041	0.041	0.04	0.041	0.04	0.04	0.04	0.04	0.039	0.041	0.044	0.041	medium only
		0	0.312148	0.468221	0.702332	1.0535	1.58025	2.37037	3.55556	5.33333	8		PRO1 ug/ml
	1	2	3	4	5	6	7	8	9	10	11	12
A	0.038	0.04	0.04	0.041	0.04	0.04	0.04	0.04	0.04	0.04	0.048	0.038	medium only
B	0.038	0.621	0.589	0.59	0.597	0.428	0.052	0.04	0.041	0.041	0.041	0.037	J53 control
C	0.037	0.631	0.603	0.603	0.606	0.453	0.212	0.041	0.041	0.042	0.044	0.037
D	0.038	0.625	0.596	0.596	0.599	0.444	0.204	0.041	0.041	0.041	0.041	0.037
E	0.038	0.631	0.598	0.594	0.603	0.606	0.462	0.192	0.245	0.043	0.042	0.037	PN42
F	0.038	0.642	0.572	0.589	0.594	0.597	0.508	0.23	0.146	0.041	0.041	0.038
G	0.038	0.635	0.594	0.597	0.596	0.601	0.479	0.193	0.142	0.042	0.042	0.038
H	0.038	0.04	0.04	0.04	0.039	0.04	0.041	0.039	0.04	0.04	0.043	0.038	medium only
		0	0.312148	0.468221	0.702332	1.0535	1.58025	2.37037	3.55556	5.33333	8		PRO1 ug/ml
	1	2	3	4	5	6	7	8	9	10	11	12
A	0.041	0.04	0.04	0.041	0.04	0.04	0.041	0.041	0.04	0.04	0.043	0.041	medium only
B	0.04	0.588	0.579	0.575	0.578	0.463	0.226	0.041	0.04	0.04	0.04	0.041	Pseva EV control
C	0.04	0.578	0.599	0.597	0.595	0.49	0.251	0.043	0.042	0.042	0.04	0.04
D	0.04	0.603	0.585	0.581	0.583	0.487	0.293	0.041	0.041	0.057	0.047	0.039
E	0.04	0.59	0.591	0.585	0.583	0.526	0.214	0.041	0.04	0.041	0.04	0.04	pSEVA:MCR-1
F	0.041	0.598	0.586	0.582	0.581	0.53	0.213	0.041	0.04	0.04	0.04	0.041
G	0.04	0.595	0.595	0.597	0.593	0.531	0.223	0.043	0.041	0.04	0.041	0.039
H	0.041	0.04	0.04	0.04	0.04	0.04	0.041	0.041	0.041	0.041	0.043	0.04	medium only
		0	0.312148	0.468221	0.702332	1.0535	1.58025	2.37037	3.55556	5.33333	8		PRO1 ug/ml
	1	2	3	4	5	6	7	8	9	10	11	12
A	0.041	0.04	0.041	0.041	0.041	0.04	0.044	0.04	0.04	0.041	0.043	0.041	medium only
B	0.04	0.58	0.573	0.569	0.57	0.532	0.294	0.175	0.067	0.056	0.052	0.042	J53 control
C	0.041	0.585	0.584	0.587	0.584	0.539	0.293	0.178	0.066	0.057	0.052	0.041
D	0.043	0.594	0.584	0.585	0.592	0.524	0.283	0.174	0.066	0.058	0.053	0.04
E	0.04	0.696	0.589	0.577	0.582	0.341	0.157	0.063	0.06	0.06	0.053	0.04	PN16
F	0.04	0.651	0.577	0.562	0.571	0.635	0.568	0.063	0.059	0.058	0.053	0.041
G	0.041	0.685	0.589	0.578	0.575	0.646	0.289	0.064	0.059	0.057	0.051	0.04
H	0.042	0.041	0.04	0.041	0.042	0.04	0.041	0.04	0.04	0.04	0.044	0.041	medium only
		0	23.4111	35.1166	52.6749	79.0123	118.519	177.778	266.667	400	600		PROPH ug/ml
	1	2	3	4	5	6	7	8	9	10	11	12
A	0.046	0.042	0.04	0.041	0.04	0.04	0.041	0.039	0.04	0.04	0.043	0.044	medium only
B	0.04	0.559	0.546	0.544	0.549	0.558	0.572	0.552	0.422	0.158	0.051	0.04	J53 control
C	0.041	0.57	0.547	0.543	0.551	0.553	0.576	0.559	0.384	0.145	0.045	0.041
D	0.041	0.572	0.541	0.543	0.548	0.554	0.575	0.547	0.366	0.138	0.045	0.04
E	0.04	0.561	0.526	0.534	0.542	0.57	0.592	0.606	0.504	0.204	0.069	0.04	PN21
F	0.04	0.556	0.519	0.536	0.542	0.566	0.593	0.6	0.508	0.202	0.063	0.041
G	0.041	0.543	0.536	0.541	0.55	0.576	0.596	0.595	0.526	0.227	0.082	0.041
H	0.045	0.041	0.04	0.041	0.04	0.04	0.04	0.04	0.04	0.04	0.044	0.045	medium only
		0	11.7055	17.5583	26.3374	39.5062	59.2593	88.8889	133.333	200	300		PROPH ug/ml
	1	2	3	4	5	6	7	8	9	10	11	12
A	0.046	0.04	0.041	0.042	0.04	0.04	0.04	0.04	0.041	0.04	0.043	0.044	medium only
B	0.041	0.57	0.542	0.544	0.553	0.56	0.56	0.55	0.404	0.149	0.05	0.04	J53 control
C	0.04	0.572	0.544	0.544	0.555	0.555	0.569	0.565	0.377	0.143	0.045	0.04
D	0.041	0.566	0.538	0.54	0.543	0.548	0.561	0.561	0.381	0.142	0.047	0.04
E	0.04	0.592	0.566	0.575	0.587	0.576	0.564	0.432	0.196	0.073	0.044	0.041	PN42
F	0.041	0.591	0.554	0.567	0.585	0.582	0.571	0.454	0.203	0.072	0.042	0.041
G	0.04	0.55	0.541	0.541	0.564	0.567	0.541	0.419	0.191	0.074	0.043	0.039
H	0.044	0.04	0.04	0.04	0.04	0.04	0.041	0.04	0.041	0.04	0.043	0.044	medium only
		0	11.7055	17.5583	26.3374	39.5062	59.2593	88.8889	133.333	200	300		PROPH ug/ml
	1	2	3	4	5	6	7	8	9	10	11	12
A	0.042	0.042	0.04	0.041	0.04	0.04	0.04	0.04	0.04	0.04	0.043	0.041	medium only
B	0.043	0.588	0.567	0.56	0.593	0.576	0.582	0.55	0.29	0.153	0.046	0.041	pSEVA EV control
C	0.049	0.597	0.581	0.569	0.579	0.582	0.59	0.511	0.229	0.115	0.046	0.042
D	0.042	0.613	0.582	0.582	0.584	0.594	0.595	0.552	0.292	0.136	0.05	0.04
E	0.04	0.623	0.581	0.565	0.57	0.584	0.615	0.543	0.268	0.136	0.046	0.041	pSEVA:MCR-1
F	0.04	0.624	0.567	0.553	0.577	0.59	0.597	0.547	0.249	0.136	0.046	0.04
G	0.041	0.617	0.577	0.57	0.584	0.606	0.595	0.56	0.293	0.148	0.046	0.04
H	0.042	0.041	0.039	0.041	0.04	0.039	0.041	0.041	0.04	0.04	0.043	0.041	medium only
		0	11.7055	17.5583	26.3374	39.5062	59.2593	88.8889	133.333	200	300		PROPH ug/ml
	1	2	3	4	5	6	7	8	9	10	11	12
A	0.043	0.041	0.04	0.042	0.041	0.041	0.041	0.04	0.042	0.041	0.043	0.042	medium only
B	0.042	0.569	0.57	0.576	0.578	0.578	0.134	0.07	0.042	0.041	0.043	0.041	J53 control
C	0.043	0.573	0.588	0.593	0.59	0.595	0.049	0.044	0.043	0.042	0.043	0.041
D	0.04	0.589	0.596	0.582	0.57	0.575	0.165	0.045	0.043	0.042	0.045	0.042
E	0.041	0.645	0.616	0.62	0.619	0.63	0.655	0.636	0.09	0.054	0.051	0.041	PN16
F	0.041	0.768	0.613	0.608	0.612	0.623	0.644	0.613	0.067	0.075	0.054	0.041
G	0.041	0.675	0.628	0.638	0.632	0.651	0.659	0.612	0.069	0.061	0.078	0.043
H	0.042	0.041	0.04	0.041	0.047	0.039	0.04	0.04	0.04	0.041	0.043	0.041	medium only
		0	3.90184	5.85277	8.77915	13.1687	19.7531	29.6296	44.4444	66.6667	100		PMAP ug/ml
	1	2	3	4	5	6	7	8	9	10	11	12
A	0.045	0.04	0.041	0.041	0.04	0.041	0.041	0.04	0.04	0.04	0.043	0.044	medium only
B	0.041	0.566	0.544	0.537	0.541	0.533	0.531	0.466	0.054	0.042	0.039	0.04	J53 control
C	0.041	0.548	0.523	0.513	0.522	0.524	0.525	0.42	0.047	0.042	0.04	0.041
D	0.041	0.577	0.541	0.542	0.546	0.541	0.55	0.502	0.049	0.041	0.04	0.04
E	0.04	0.572	0.523	0.514	0.512	0.517	0.525	0.501	0.563	0.148	0.039	0.04	PN21
F	0.041	0.556	0.517	0.498	0.497	0.507	0.578	0.513	0.524	0.14	0.039	0.04
G	0.041	0.562	0.514	0.51	0.515	0.506	0.491	0.496	0.551	0.28	0.039	0.04
H	0.044	0.041	0.039	0.041	0.04	0.039	0.04	0.04	0.039	0.04	0.043	0.044	medium only
		0	3.12148	4.68221	7.02332	10.535	15.8025	23.7037	35.5556	53.3333	80		PMAP ug/ml
	1	2	3	4	5	6	7	8	9	10	11	12
A	0.044	0.04	0.04	0.041	0.04	0.04	0.04	0.04	0.04	0.04	0.043	0.044	medium only
B	0.04	0.561	0.529	0.539	0.542	0.539	0.539	0.373	0.048	0.041	0.038	0.04	J53 control
C	0.04	0.56	0.552	0.546	0.547	0.552	0.549	0.479	0.045	0.042	0.039	0.039
D	0.04	0.558	0.552	0.544	0.543	0.551	0.545	0.453	0.044	0.042	0.04	0.04
E	0.04	0.553	0.557	0.55	0.545	0.547	0.552	0.569	0.046	0.073	0.039	0.04	PN42
F	0.041	0.601	0.542	0.546	0.54	0.544	0.546	0.562	0.044	0.041	0.039	0.041
G	0.041	0.559	0.55	0.544	0.545	0.548	0.551	0.553	0.053	0.041	0.04	0.04
H	0.044	0.04	0.04	0.04	0.04	0.04	0.041	0.039	0.04	0.04	0.043	0.044	medium only
		0	3.12148	4.68221	7.02332	10.535	15.8025	23.7037	35.5556	53.3333	80		PMAP ug/ml
	1	2	3	4	5	6	7	8	9	10	11	12
A	0.041	0.04	0.039	0.04	0.039	0.04	0.039	0.039	0.04	0.039	0.043	0.041	medium only
B	0.041	0.57	0.565	0.546	0.556	0.55	0.044	0.042	0.041	0.042	0.041	0.041	Pseva EV control
C	0.04	0.57	0.589	0.564	0.568	0.567	0.043	0.042	0.042	0.044	0.041	0.04
D	0.041	0.588	0.587	0.542	0.558	0.563	0.045	0.042	0.042	0.043	0.04	0.04
E	0.041	0.58	0.581	0.545	0.566	0.562	0.549	0.041	0.04	0.04	0.041	0.04	pSEVA:MCR-1
F	0.041	0.592	0.58	0.564	0.569	0.569	0.533	0.043	0.041	0.041	0.042	0.042
G	0.041	0.588	0.59	0.572	0.572	0.574	0.541	0.044	0.043	0.041	0.042	0.041
H	0.042	0.039	0.04	0.04	0.039	0.039	0.04	0.04	0.041	0.04	0.044	0.041	medium only
		0	3.90184	5.85277	8.77915	13.1687	19.7531	29.6296	44.4444	66.6667	100		PMAP ug/ml
	1	2	3	4	5	6	7	8	9	10	11	12
A	0.038	0.04	0.04	0.04	0.039	0.04	0.041	0.04	0.04	0.04	0.043	0.038	medium only
B	0.038	0.611	0.439	0.359	0.277	0.111	0.042	0.043	0.042	0.041	0.042	0.037	J53 control
C	0.039	0.58	0.492	0.36	0.21	0.084	0.043	0.042	0.042	0.041	0.041	0.038
D	0.038	0.581	0.456	0.299	0.214	0.052	0.042	0.043	0.042	0.042	0.042	0.037
E	0.037	0.675	0.605	0.622	0.634	0.63	0.629	0.326	0.102	0.042	0.04	0.037	PN16
F	0.037	0.705	0.602	0.613	0.622	0.623	0.634	0.257	0.044	0.042	0.041	0.037
G	0.038	0.699	0.611	0.62	0.617	0.625	0.61	0.205	0.045	0.042	0.043	0.037
H	0.038	0.04	0.04	0.042	0.04	0.04	0.04	0.039	0.039	0.04	0.043	0.038	medium only
		0	1.17055	1.75583	2.63374	3.95062	5.92593	8.88889	13.3333	20	30		CATH2 ug/ml
	1	2	3	4	5	6	7	8	9	10	11	12
A	0.038	0.04	0.04	0.041	0.04	0.04	0.04	0.039	0.04	0.034	0.044	0.044	medium only
B	0.037	0.613	0.569	0.436	0.345	0.236	0.045	0.039	0.063	0.039	0.042	0.038	J53 control
C	0.037	0.628	0.588	0.428	0.359	0.172	0.041	0.041	0.038	0.041	0.04	0.036
D	0.037	0.631	0.564	0.426	0.355	0.176	0.041	0.041	0.04	0.043	0.04	0.038
E	0.037	0.585	0.569	0.559	0.549	0.525	0.238	0.394	0.105	0.067	0.04	0.038	PN21
F	0.038	0.573	0.561	0.564	0.542	0.411	0.242	0.148	0.185	0.085	0.043	0.039
G	0.038	0.626	0.566	0.614	0.554	0.386	0.24	0.198	0.13	0.042	0.041	0.038
H	0.038	0.04	0.04	0.04	0.039	0.04	0.04	0.039	0.04	0.04	0.043	0.034	medium only
		0	1.17055	1.75583	2.63374	3.95062	5.92593	8.88889	13.3333	20	30		CATH2 ug/ml
	1	2	3	4	5	6	7	8	9	10	11	12
A	0.045	0.04	0.041	0.04	0.039	0.042	0.041	0.041	0.04	0.04	0.043	0.038	medium only
B	0.041	0.618	0.481	0.334	0.272	0.078	0.043	0.042	0.042	0.042	0.045	0.038	J53 control
C	0.039	0.635	0.49	0.341	0.227	0.137	0.043	0.042	0.042	0.042	0.044	0.038
D	0.039	0.632	0.465	0.345	0.243	0.124	0.042	0.043	0.044	0.044	0.045	0.037
E	0.038	0.643	0.625	0.682	0.661	0.572	0.331	0.042	0.044	0.042	0.043	0.038	PN42
F	0.038	0.607	0.612	0.649	0.656	0.502	0.224	0.041	0.043	0.042	0.043	0.037
G	0.038	0.66	0.611	0.643	0.61	0.365	0.046	0.042	0.042	0.044	0.042	0.038
H	0.043	0.04	0.039	0.041	0.04	0.039	0.04	0.042	0.041	0.041	0.043	0.054	medium only
		0	0.780369	1.17055	1.75583	2.63374	3.95062	5.92593	8.88889	13.3333	20	30	CATH2 ug/ml
	1	2	3	4	5	6	7	8	9	10	11	12
A	0.041	0.04	0.04	0.041	0.04	0.039	0.039	0.04	0.042	0.039	0.043	0.041	medium only
B	0.041	0.589	0.458	0.322	0.055	0.049	0.043	0.041	0.041	0.042	0.042	0.041	Pseva EV control
C	0.043	0.597	0.504	0.417	0.314	0.121	0.043	0.043	0.043	0.042	0.044	0.04
D	0.04	0.601	0.474	0.406	0.307	0.101	0.046	0.041	0.044	0.042	0.043	0.04
E	0.041	0.606	0.579	0.369	0.254	0.069	0.048	0.042	0.042	0.042	0.041	0.041	pSEVA:MCR-1
F	0.042	0.604	0.544	0.426	0.211	0.104	0.042	0.042	0.041	0.042	0.04	0.041
G	0.041	0.602	0.465	0.347	0.209	0.042	0.042	0.042	0.042	0.05	0.044	0.04
H	0.041	0.04	0.04	0.039	0.039	0.039	0.04	0.039	0.04	0.039	0.043	0.041	medium only
		0	1.17055	1.75583	2.63374	3.95062	5.92593	8.88889	13.3333	20	30		CATH2 ug/ml
	1	2	3	4	5	6	7	8	9	10	11	12
A	0.041	0.04	0.04	0.042	0.041	0.039	0.039	0.039	0.04	0.041	0.043	0.041	medium only
B	0.04	0.583	0.577	0.408	0.467	0.345	0.381	0.226	0.074	0.044	0.044	0.042	J53 control
C	0.041	0.617	0.589	0.486	0.531	0.381	0.461	0.196	0.064	0.044	0.044	0.04
D	0.041	0.615	0.593	0.451	0.424	0.4	0.277	0.343	0.042	0.043	0.043	0.042
E	0.042	0.799	0.656	0.665	0.659	0.694	0.672	0.659	0.668	0.653	0.523	0.04	PN16
F	0.041	0.765	0.614	0.641	0.631	0.666	0.657	0.66	0.669	0.644	0.515	0.042
G	0.04	0.737	0.612	0.633	0.609	0.652	0.658	0.647	0.641	0.637	0.55	0.042
H	0.041	0.041	0.04	0.04	0.04	0.04	0.041	0.04	0.041	0.041	0.045	0.042	medium only
		0	4.68221	7.02332	10.535	15.8025	23.7037	35.5556	53.3333	80	120		FOW ug/ml
	1	2	3	4	5	6	7	8	9	10	11	12
A	0.038	0.041	0.041	0.043	0.042	0.041	0.04	0.04	0.041	0.041	0.043	0.037	medium only
B	0.037	0.594	0.572	0.399	0.397	0.397	0.283	0.122	0.043	0.042	0.042	0.037	J53 control
C	0.041	0.588	0.588	0.391	0.404	0.37	0.294	0.204	0.063	0.044	0.043	0.037
D	0.037	0.599	0.585	0.416	0.389	0.358	0.224	0.219	0.055	0.045	0.044	0.037
E	0.038	0.618	0.584	0.592	0.59	0.577	0.566	0.52	0.473	0.394	0.045	0.037	PN21
F	0.038	0.596	0.557	0.591	0.559	0.571	0.542	0.513	0.493	0.11	0.044	0.038
G	0.038	0.586	0.57	0.553	0.552	0.547	0.527	0.489	0.18	0.109	0.047	0.037
H	0.038	0.041	0.041	0.04	0.04	0.04	0.041	0.04	0.041	0.046	0.047	0.038	medium only
		0	4.68221	7.02332	10.535	15.8025	23.7037	35.5556	53.3333	80	120		FOW ug/ml
	1	2	3	4	5	6	7	8	9	10	11	12
A	0.038	0.044	0.044	0.043	0.04	0.041	0.041	0.036	0.036	0.035	0.043	0.037	medium only
B	0.037	0.588	0.549	0.505	0.467	0.405	0.28	0.19	0.135	0.042	0.041	0.037	J53 control
C	0.039	0.593	0.561	0.523	0.515	0.499	0.334	0.225	0.042	0.043	0.043	0.038
D	0.038	0.597	0.571	0.551	0.521	0.478	0.303	0.06	0.041	0.046	0.043	0.037
E	0.037	0.597	0.561	0.556	0.554	0.553	0.561	0.538	0.488	0.212	0.048	0.037	P42
F	0.037	0.608	0.565	0.565	0.558	0.558	0.564	0.553	0.505	0.184	0.042	0.037
G	0.037	0.608	0.557	0.546	0.536	0.531	0.542	0.526	0.508	0.406	0.046	0.037
H	0.038	0.041	0.04	0.042	0.041	0.043	0.043	0.043	0.041	0.048	0.043	0.038	medium only
		0	4.68221	7.02332	10.535	15.8025	23.7037	35.5556	53.3333	80	120		FOW ug/ml
	1	2	3	4	5	6	7	8	9	10	11	12
A	0.041	0.039	0.04	0.04	0.039	0.039	0.039	0.039	0.04	0.04	0.043	0.041	medium only
B	0.041	0.578	0.588	0.373	0.314	0.257	0.244	0.041	0.04	0.043	0.042	0.043	pSEVA EV control
C	0.042	0.579	0.612	0.439	0.368	0.338	0.253	0.204	0.042	0.044	0.043	0.042
D	0.041	0.572	0.622	0.464	0.389	0.344	0.247	0.224	0.055	0.044	0.045	0.041
E	0.041	0.575	0.621	0.548	0.436	0.404	0.329	0.162	0.041	0.043	0.043	0.04	pSEVA:MCR-1
F	0.04	0.59	0.611	0.552	0.48	0.431	0.334	0.222	0.042	0.045	0.043	0.04
G	0.041	0.578	0.615	0.548	0.427	0.404	0.35	0.201	0.042	0.043	0.043	0.04
H	0.041	0.04	0.04	0.041	0.04	0.04	0.04	0.04	0.039	0.04	0.043	0.041	medium only
		0	4.68221	7.02332	10.535	15.8025	23.7037	35.5556	53.3333	80	120		FOW ug/ml
	1	2	3	4	5	6	7	8	9	10	11	12
A	0.041	0.038	0.038	0.039	0.038	0.038	0.039	0.037	0.038	0.039	0.043	0.038	medium only
B	0.051	0.523	0.562	0.552	0.544	0.538	0.499	0.045	0.04	0.04	0.041	0.038	J53 control
C	0.039	0.538	0.57	0.569	0.561	0.559	0.526	0.046	0.041	0.041	0.041	0.039
D	0.039	0.557	0.579	0.576	0.565	0.554	0.529	0.044	0.041	0.044	0.04	0.038
E	0.038	0.58	0.56	0.564	0.56	0.553	0.545	0.54	0.047	0.042	0.041	0.038	WJ1
F	0.038	0.587	0.553	0.552	0.55	0.545	0.543	0.536	0.046	0.043	0.04	0.039
G	0.041	0.584	0.568	0.56	0.553	0.547	0.539	0.532	0.051	0.042	0.039	0.038
H	0.039	0.039	0.037	0.04	0.038	0.037	0.038	0.038	0.038	0.038	0.043	0.039	medium only
		0	3.12148	4.68221	7.02332	10.535	15.8025	23.7037	35.5556	53.3333	80		PMAP ug/ml
	1	2	3	4	5	6	7	8	9	10	11	12
A	0.04	0.037	0.038	0.039	0.038	0.037	0.038	0.045	0.038	0.038	0.043	0.038	medium only
B	0.037	0.566	0.562	0.559	0.544	0.549	0.516	0.067	0.04	0.042	0.039	0.038	J53 control
C	0.037	0.58	0.576	0.571	0.561	0.559	0.526	0.056	0.04	0.04	0.04	0.038
D	0.06	0.581	0.573	0.571	0.56	0.56	0.536	0.075	0.04	0.04	0.039	0.037
E	0.037	0.598	0.585	0.583	0.579	0.581	0.58	0.571	0.043	0.04	0.041	0.038	481
F	0.039	0.59	0.579	0.582	0.573	0.577	0.576	0.568	0.043	0.04	0.043	0.039
G	0.038	0.574	0.586	0.574	0.579	0.576	0.571	0.55	0.044	0.043	0.041	0.041
H	0.042	0.038	0.038	0.037	0.039	0.038	0.038	0.037	0.038	0.038	0.043	0.038	medium only
		0	3.12148	4.68221	7.02332	10.535	15.8025	23.7037	35.5556	53.3333	80		PMAP ug/ml
	1	2	3	4	5	6	7	8	9	10	11	12
A	0.038	0.039	0.039	0.04	0.039	0.039	0.039	0.039	0.04	0.039	0.043	0.041	medium only
B	0.039	0.526	0.535	0.457	0.346	0.34	0.232	0.182	0.041	0.044	0.043	0.04	J53 control
C	0.037	0.568	0.56	0.492	0.39	0.326	0.278	0.157	0.042	0.044	0.045	0.037
D	0.038	0.542	0.573	0.489	0.356	0.321	0.231	0.147	0.041	0.043	0.043	0.038
E	0.038	0.586	0.574	0.573	0.521	0.498	0.378	0.257	0.13	0.043	0.043	0.038	WJ1
F	0.039	0.608	0.553	0.579	0.517	0.503	0.376	0.259	0.189	0.043	0.043	0.039
G	0.042	0.617	0.557	0.549	0.511	0.503	0.366	0.345	0.103	0.05	0.045	0.038
H	0.038	0.039	0.04	0.041	0.044	0.039	0.04	0.039	0.041	0.042	0.044	0.041	medium only
		0	4.68221	7.02332	10.535	15.8025	23.7037	35.5556	53.3333	80	120		FOW ug/ml
	1	2	3	4	5	6	7	8	9	10	11	12
A	0.039	0.039	0.04	0.04	0.039	0.039	0.04	0.039	0.039	0.039	0.043	0.039	medium only
B	0.038	0.534	0.529	0.465	0.338	0.313	0.214	0.189	0.042	0.044	0.04	0.038	J53 control
C	0.039	0.57	0.55	0.45	0.344	0.335	0.222	0.145	0.043	0.045	0.042	0.039
D	0.039	0.55	0.528	0.441	0.348	0.319	0.221	0.074	0.041	0.043	0.043	0.038
E	0.038	0.548	0.568	0.563	0.523	0.494	0.354	0.215	0.044	0.044	0.043	0.037	481
F	0.037	0.56	0.55	0.548	0.509	0.491	0.347	0.223	0.245	0.043	0.043	0.037
G	0.039	0.577	0.552	0.542	0.51	0.476	0.341	0.204	0.204	0.051	0.042	0.041
H	0.04	0.04	0.039	0.042	0.039	0.039	0.039	0.039	0.039	0.039	0.044	0.039	medium only
		0	4.68221	7.02332	10.535	15.8025	23.7037	35.5556	53.3333	80	120		FOW ug/ml
	1	2	3	4	5	6	7	8	9	10	11	12
A	0.039	0.038	0.038	0.038	0.038	0.038	0.039	0.037	0.038	0.038	0.043	0.038	medium only
B	0.038	0.541	0.381	0.11	0.041	0.04	0.04	0.04	0.04	0.039	0.038	0.038	J53 control
C	0.039	0.518	0.466	0.155	0.073	0.039	0.04	0.04	0.039	0.04	0.038	0.039
D	0.038	0.52	0.566	0.065	0.042	0.041	0.04	0.04	0.04	0.039	0.039	0.038
E	0.038	0.584	0.556	0.549	0.491	0.197	0.127	0.056	0.054	0.039	0.043	0.038	WJ1
F	0.038	0.594	0.563	0.551	0.424	0.187	0.105	0.044	0.041	0.039	0.039	0.038
G	0.038	0.597	0.569	0.558	0.491	0.2	0.051	0.042	0.043	0.039	0.038	0.038
H	0.038	0.038	0.037	0.039	0.038	0.038	0.038	0.039	0.037	0.038	0.043	0.039	medium only
		0	1.36565	2.04847	3.0727	4.60905	6.91358	10.3704	15.5556	23.3333	35		CP1 ug/ml
	1	2	3	4	5	6	7	8	9	10	11	12
A	0.039	0.038	0.038	0.039	0.037	0.038	0.039	0.039	0.038	0.038	0.043	0.039	medium only
B	0.04	0.565	0.511	0.153	0.041	0.04	0.04	0.041	0.04	0.041	0.038	0.039	J53 control
C	0.039	0.577	0.497	0.168	0.041	0.04	0.04	0.04	0.04	0.039	0.039	0.039
D	0.038	0.582	0.539	0.176	0.04	0.04	0.038	0.04	0.04	0.039	0.038	0.037
E	0.037	0.602	0.571	0.539	0.304	0.095	0.074	0.04	0.081	0.044	0.04	0.037	481
F	0.038	0.6	0.56	0.531	0.247	0.117	0.041	0.04	0.04	0.04	0.038	0.037
G	0.038	0.598	0.565	0.536	0.166	0.104	0.041	0.043	0.056	0.042	0.038	0.037
H	0.039	0.039	0.038	0.039	0.039	0.038	0.038	0.037	0.038	0.038	0.043	0.04	medium only
		0	1.36565	2.04847	3.0727	4.60905	6.91358	10.3704	15.5556	23.3333	35		CP1 ug/ml
	1	2	3	4	5	6	7	8	9	10	11	12
A	0.038	0.039	0.039	0.041	0.039	0.039	0.039	0.039	0.039	0.039	0.043	0.039	medium only
B	0.037	0.553	0.548	0.553	0.551	0.492	0.243	0.055	0.044	0.042	0.04	0.039	J53 control
C	0.037	0.568	0.559	0.561	0.561	0.502	0.243	0.053	0.045	0.042	0.041	0.037
D	0.037	0.591	0.561	0.551	0.558	0.523	0.246	0.053	0.044	0.042	0.04	0.039
E	0.038	0.587	0.566	0.567	0.555	0.53	0.288	0.052	0.048	0.042	0.039	0.038	WJ1
F	0.038	0.579	0.562	0.558	0.545	0.524	0.289	0.053	0.045	0.042	0.039	0.038
G	0.038	0.589	0.562	0.56	0.539	0.529	0.297	0.057	0.05	0.042	0.04	0.037
H	0.038	0.039	0.04	0.039	0.039	0.039	0.039	0.039	0.053	0.041	0.044	0.039	medium only
		0	1.17055	1.75583	2.63374	3.95062	5.92593	8.88889	13.3333	20	30		PR39
	1	2	3	4	5	6	7	8	9	10	11	12
A	0.04	0.04	0.04	0.04	0.039	0.04	0.04	0.039	0.039	0.04	0.043	0.037	medium only
B	0.038	0.564	0.528	0.526	0.527	0.522	0.425	0.201	0.041	0.041	0.039	0.038	J53 control
C	0.039	0.568	0.534	0.543	0.531	0.539	0.413	0.167	0.044	0.041	0.039	0.038
D	0.038	0.578	0.542	0.543	0.544	0.544	0.411	0.167	0.043	0.041	0.039	0.039
E	0.039	0.574	0.536	0.539	0.537	0.528	0.37	0.051	0.043	0.042	0.04	0.037	481
F	0.038	0.574	0.538	0.542	0.538	0.519	0.315	0.05	0.042	0.041	0.038	0.037
G	0.038	0.576	0.552	0.55	0.54	0.539	0.353	0.051	0.043	0.041	0.039	0.038
H	0.038	0.04	0.039	0.04	0.039	0.039	0.039	0.039	0.039	0.04	0.043	0.039	medium only
		0	1.17055	1.75583	2.63374	3.95062	5.92593	8.88889	13.3333	20	30		PR39
	1	2	3	4	5	6	7	8	9	10	11	12
A	0.044	0.037	0.037	0.038	0.037	0.038	0.038	0.037	0.037	0.038	0.043	0.038	medium only
B	0.038	0.543	0.544	0.533	0.528	0.518	0.495	0.429	0.279	0.107	0.042	0.038	J53 control
C	0.039	0.517	0.55	0.542	0.533	0.526	0.49	0.406	0.328	0.14	0.042	0.038
D	0.039	0.54	0.557	0.543	0.529	0.509	0.483	0.409	0.318	0.144	0.053	0.037
E	0.037	0.554	0.569	0.561	0.549	0.54	0.494	0.434	0.387	0.221	0.105	0.038	WJ1
F	0.038	0.604	0.579	0.577	0.563	0.555	0.558	0.536	0.488	0.326	0.125	0.037
G	0.038	0.58	0.569	0.555	0.543	0.537	0.488	0.433	0.366	0.168	0.099	0.038
H	0.038	0.039	0.038	0.041	0.039	0.037	0.038	0.038	0.037	0.038	0.043	0.039	medium only
		0	13.6565	20.4847	30.727	46.0905	69.1358	103.704	155.556	233.333	350		HBD3 ug/ml
	1	2	3	4	5	6	7	8	9	10	11	12
A	0.038	0.037	0.037	0.038	0.04	0.037	0.037	0.037	0.039	0.038	0.043	0.039	medium only
B	0.037	0.543	0.539	0.528	0.506	0.522	0.501	0.449	0.264	0.129	0.057	0.038	J53 control
C	0.037	0.54	0.555	0.543	0.526	0.524	0.498	0.43	0.332	0.158	0.063	0.037
D	0.037	0.545	0.558	0.544	0.522	0.526	0.492	0.426	0.327	0.158	0.05	0.038
E	0.038	0.564	0.574	0.564	0.41	0.57	0.561	0.502	0.394	0.188	0.115	0.038	481
F	0.038	0.585	0.558	0.56	0.539	0.56	0.536	0.496	0.384	0.172	0.119	0.039
G	0.038	0.58	0.573	0.569	0.55	0.562	0.549	0.507	0.348	0.166	0.106	0.037
H	0.038	0.037	0.037	0.038	0.037	0.038	0.039	0.038	0.038	0.038	0.043	0.039	medium only
		0	13.6565	20.4847	30.727	46.0905	69.1358	103.704	155.556	233.333	350		HBD3 ug/ml
	1	2	3	4	5	6	7	8	9	10	11	12
A	0.039	0.038	0.038	0.039	0.037	0.041	0.038	0.037	0.038	0.038	0.043	0.039	medium only
B	0.038	0.546	0.313	0.209	0.163	0.043	0.041	0.042	0.041	0.04	0.039	0.038	J53 control
C	0.039	0.562	0.339	0.251	0.207	0.067	0.041	0.041	0.041	0.04	0.04	0.038
D	0.038	0.57	0.344	0.25	0.182	0.061	0.041	0.041	0.042	0.041	0.04	0.037
E	0.037	0.618	0.549	0.277	0.191	0.191	0.042	0.041	0.042	0.041	0.039	0.037	WJ1
F	0.037	0.607	0.541	0.287	0.179	0.131	0.041	0.041	0.042	0.041	0.04	0.037
G	0.038	0.61	0.508	0.267	0.184	0.076	0.045	0.041	0.041	0.041	0.039	0.038
H	0.041	0.038	0.038	0.039	0.038	0.038	0.038	0.038	0.037	0.038	0.043	0.039	medium only
		0	1.17055	1.75583	2.63374	3.95062	5.92593	8.88889	13.3333	20	30		CATH2 ug/ml
	1	2	3	4	5	6	7	8	9	10	11	12
A	0.038	0.037	0.039	0.038	0.037	0.038	0.037	0.037	0.043	0.038	0.043	0.038	medium only
B	0.038	0.55	0.534	0.431	0.365	0.173	0.05	0.041	0.042	0.04	0.038	0.038	J53 control
C	0.037	0.569	0.549	0.492	0.407	0.225	0.044	0.043	0.041	0.041	0.039	0.037
D	0.038	0.567	0.541	0.501	0.411	0.221	0.042	0.041	0.041	0.041	0.039	0.037
E	0.038	0.569	0.553	0.544	0.505	0.213	0.129	0.163	0.063	0.041	0.039	0.038	481
F	0.039	0.574	0.551	0.546	0.471	0.189	0.159	0.14	0.041	0.041	0.039	0.039
G	0.038	0.57	0.555	0.54	0.42	0.094	0.048	0.042	0.042	0.041	0.04	0.037
H	0.039	0.039	0.038	0.038	0.037	0.038	0.039	0.037	0.04	0.038	0.043	0.039	medium only
		0	1.17055	1.75583	2.63374	3.95062	5.92593	8.88889	13.3333	20	30		CATH2 ug/ml
	1	2	3	4	5	6	7	8	9	10	11	12
A	0.043	0.038	0.039	0.039	0.038	0.039	0.039	0.037	0.038	0.038	0.043	0.038	medium only
B	0.038	0.553	0.554	0.546	0.545	0.547	0.378	0.161	0.08	0.051	0.044	0.038	J53 control
C	0.04	0.553	0.564	0.562	0.564	0.569	0.453	0.207	0.113	0.054	0.044	0.039
D	0.039	0.554	0.575	0.568	0.567	0.58	0.476	0.222	0.131	0.055	0.045	0.038
E	0.039	0.552	0.589	0.569	0.561	0.562	0.539	0.345	0.183	0.084	0.044	0.037	WJ1
F	0.038	0.571	0.522	0.512	0.522	0.524	0.494	0.271	0.16	0.071	0.044	0.037
G	0.038	0.59	0.563	0.548	0.547	0.554	0.526	0.284	0.151	0.059	0.044	0.038
H	0.038	0.038	0.038	0.039	0.038	0.037	0.037	0.037	0.038	0.038	0.043	0.039	medium only
		0	11.7055	17.5583	26.3374	39.5062	59.2593	88.8889	133.333	200	300		PROPH ug/ml
	1	2	3	4	5	6	7	8	9	10	11	12
A	0.045	0.038	0.055	0.041	0.038	0.038	0.038	0.037	0.038	0.038	0.043	0.039	medium only
B	0.038	0.557	0.555	0.553	0.562	0.553	0.373	0.157	0.078	0.05	0.043	0.038	J53 control
C	0.038	0.565	0.566	0.565	0.569	0.569	0.455	0.202	0.11	0.051	0.043	0.037
D	0.039	0.574	0.56	0.558	0.553	0.566	0.449	0.21	0.117	0.052	0.044	0.038
E	0.039	0.59	0.556	0.524	0.568	0.577	0.48	0.219	0.133	0.06	0.043	0.038	481
F	0.038	0.589	0.533	0.545	0.547	0.559	0.446	0.205	0.122	0.054	0.042	0.041
G	0.039	0.583	0.54	0.555	0.553	0.546	0.435	0.189	0.095	0.051	0.044	0.039
H	0.046	0.038	0.038	0.04	0.038	0.038	0.038	0.037	0.038	0.039	0.043	0.039	medium only
		0	11.7055	17.5583	26.3374	39.5062	59.2593	88.8889	133.333	200	300		PROPH ug/ml
	1	2	3	4	5	6	7	8	9	10	11	12
A	0.063	0.037	0.038	0.039	0.038	0.038	0.038	0.038	0.039	0.038	0.043	0.04	medium only
B	0.038	0.571	0.548	0.547	0.55	0.557	0.357	0.067	0.041	0.041	0.039	0.038	J53 control
C	0.038	0.576	0.55	0.547	0.552	0.555	0.399	0.075	0.04	0.042	0.039	0.037
D	0.038	0.573	0.542	0.542	0.547	0.55	0.386	0.123	0.04	0.041	0.039	0.038
E	0.038	0.602	0.539	0.536	0.538	0.543	0.468	0.215	0.043	0.041	0.04	0.038	WJ1
F	0.042	0.604	0.534	0.535	0.536	0.547	0.444	0.155	0.04	0.04	0.039	0.04
G	0.039	0.614	0.547	0.543	0.544	0.546	0.403	0.129	0.042	0.04	0.04	0.037
H	0.039	0.038	0.038	0.038	0.042	0.038	0.039	0.037	0.052	0.039	0.043	0.038	medium only
		0	0.312148	0.468221	0.702332	1.0535	1.58025	2.37037	3.55556	5.33333	8		PRO1 ug.ml
	1	2	3	4	5	6	7	8	9	10	11	12
A	0.044	0.04	0.039	0.039	0.037	0.038	0.041	0.038	0.043	0.038	0.043	0.042	medium only
B	0.038	0.571	0.527	0.522	0.544	0.54	0.398	0.069	0.04	0.042	0.039	0.038	J53 control
C	0.039	0.565	0.544	0.543	0.547	0.537	0.416	0.286	0.116	0.042	0.04	0.039
D	0.039	0.579	0.538	0.543	0.545	0.541	0.443	0.207	0.097	0.042	0.04	0.038
E	0.037	0.568	0.54	0.54	0.538	0.546	0.46	0.203	0.041	0.041	0.048	0.038	481
F	0.038	0.59	0.536	0.534	0.539	0.545	0.453	0.168	0.132	0.04	0.039	0.038
G	0.039	0.574	0.544	0.543	0.542	0.541	0.368	0.413	0.099	0.041	0.04	0.038
H	0.039	0.039	0.038	0.039	0.038	0.039	0.038	0.038	0.037	0.039	0.044	0.039	medium only
		0	0.312148	0.468221	0.702332	1.0535	1.58025	2.37037	3.55556	5.33333	8		PRO1 ug.ml
	1	2	3	4	5	6	7	8	9	10	11	12
A	0.041	0.037	0.037	0.039	0.037	0.037	0.037	0.038	0.038	0.037	0.043	0.039	medium only
B	0.038	0.513	0.543	0.542	0.561	0.567	0.388	0.041	0.042	0.042	0.039	0.038	J53 control
C	0.037	0.522	0.565	0.553	0.55	0.56	0.403	0.041	0.042	0.042	0.041	0.037
D	0.038	0.534	0.55	0.549	0.548	0.561	0.4	0.041	0.042	0.042	0.041	0.04
E	0.039	0.587	0.571	0.568	0.557	0.563	0.543	0.196	0.043	0.041	0.04	0.038	WJ1
F	0.038	0.603	0.571	0.571	0.563	0.563	0.549	0.218	0.043	0.041	0.04	0.039
G	0.038	0.599	0.567	0.568	0.568	0.563	0.546	0.2	0.042	0.042	0.04	0.038
H	0.038	0.038	0.038	0.038	0.037	0.038	0.038	0.039	0.038	0.038	0.043	0.041	medium only
		0	3.12148	4.68221	7.02332	10.535	15.8025	23.7037	35.5556	53.3333	80		LL37 ug/ml
	1	2	3	4	5	6	7	8	9	10	11	12
A	0.038	0.037	0.038	0.039	0.038	0.038	0.038	0.038	0.038	0.038	0.043	0.038	medium only
B	0.038	0.567	0.554	0.547	0.546	0.55	0.531	0.147	0.042	0.043	0.044	0.038	J53 control
C	0.038	0.594	0.614	0.607	0.608	0.614	0.596	0.398	0.07	0.044	0.047	0.037
D	0.037	0.585	0.567	0.546	0.569	0.568	0.52	0.098	0.042	0.042	0.041	0.037
E	0.037	0.605	0.579	0.554	0.571	0.567	0.561	0.193	0.042	0.042	0.04	0.038	481
F	0.038	0.627	0.582	0.584	0.584	0.578	0.576	0.562	0.08	0.043	0.042	0.038
G	0.038	0.617	0.568	0.565	0.58	0.575	0.553	0.32	0.043	0.042	0.041	0.037
H	0.038	0.038	0.038	0.037	0.038	0.037	0.038	0.037	0.038	0.04	0.043	0.038	medium only
		0	3.12148	4.68221	7.02332	10.535	15.8025	23.7037	35.5556	53.3333	80		LL37 ug/ml
	1	2	3	4	5	6	7	8	9	10	11	12
A	0.039	0.039	0.039	0.039	0.039	0.039	0.04	0.039	0.039	0.039	0.039	0.044	medium only
B	0.511	0.502	0.503	0.495	0.506	0.493	0.507	0.497	0.494	0.321	0.131	0.044	J53 control
C	0.508	0.52	0.517	0.494	0.518	0.497	0.501	0.509	0.498	0.28	0.048	0.045
D	0.506	0.507	0.493	0.489	0.504	0.494	0.513	0.509	0.512	0.306	0.077	0.045
E	0.498	0.506	0.501	0.497	0.506	0.489	0.511	0.49	0.498	0.473	0.155	0.044	PN23
F	0.512	0.5	0.5	0.492	0.485	0.507	0.515	0.491	0.519	0.483	0.18	0.042
G	0.527	0.512	0.502	0.495	0.514	0.502	0.499	0.507	0.506	0.497	0.087	0.043
H	0.039	0.04	0.039	0.04	0.04	0.039	0.039	0.039	0.038	0.04	0.039	0.043	medium only
	0	0.867076	1.30061	1.95092	2.92638	4.38957	6.58436	9.87654	14.8148	22.2222	33.3333	50	LL37 ug/ml
	1	2	3	4	5	6	7	8	9	10	11	12
A	0.039	0.039	0.039	0.041	0.039	0.04	0.039	0.039	0.038	0.038	0.038	0.044	medium only
B	0.469	0.443	0.371	0.308	0.158	0.245	0.225	0.163	0.142	0.131	0.088	0.04	J53 control
C	0.465	0.474	0.361	0.323	0.194	0.262	0.193	0.181	0.181	0.127	0.09	0.039
D	0.463	0.473	0.374	0.32	0.233	0.278	0.212	0.181	0.169	0.129	0.089	0.038
E	0.463	0.482	0.496	0.453	0.428	0.367	0.331	0.299	0.247	0.228	0.18	0.041	PN23
F	0.487	0.519	0.499	0.481	0.42	0.36	0.327	0.307	0.258	0.225	0.193	0.044
G	0.485	0.51	0.509	0.472	0.44	0.374	0.346	0.305	0.251	0.238	0.211	0.043
H	0.04	0.04	0.039	0.04	0.039	0.04	0.04	0.039	0.04	0.04	0.039	0.043	medium only
	0	9.1043	13.6565	20.4847	30.727	46.0905	69.1358	103.704	155.556	233.333	350		HBD3 ug/ml
	1	2	3	4	5	6	7	8	9	10	11	12
A	0.039	0.039	0.039	0.039	0.039	0.039	0.04	0.039	0.038	0.04	0.039	0.044	medium only
B	0.516	0.533	0.528	0.53	0.51	0.528	0.502	0.192	0.048	0.04	0.039	0.038	J53 control
C	0.533	0.538	0.544	0.54	0.539	0.541	0.528	0.192	0.043	0.04	0.039	0.039
D	0.516	0.515	0.536	0.54	0.516	0.548	0.522	0.147	0.043	0.04	0.039	0.038
E	0.527	0.53	0.52	0.512	0.52	0.526	0.518	0.523	0.489	0.402	0.115	0.038	PN23
F	0.547	0.526	0.51	0.526	0.518	0.524	0.512	0.508	0.476	0.346	0.162	0.039
G	0.531	0.53	0.532	0.533	0.522	0.527	0.519	0.514	0.487	0.445	0.147	0.039
H	0.04	0.039	0.039	0.041	0.039	0.039	0.039	0.039	0.039	0.039	0.039	0.043	medium only
	0	0.138732	0.208098	0.312148	0.468221	0.702332	1.0535	1.58025	2.37037	3.55556	5.33333	8	CP1 ug/ml
	1	2	3	4	5	6	7	8	9	10	11	12
A	0.039	0.039	0.039	0.039	0.039	0.04	0.04	0.039	0.039	0.039	0.039	0.043	medium only
B	0.522	0.55	0.523	0.531	0.498	0.487	0.501	0.493	0.287	0.07	0.044	0.042	J53 control
C	0.517	0.553	0.537	0.548	0.55	0.539	0.526	0.506	0.3	0.07	0.043	0.044
D	0.519	0.542	0.544	0.535	0.529	0.533	0.527	0.502	0.312	0.067	0.043	0.043
E	0.558	0.542	0.539	0.537	0.536	0.52	0.517	0.511	0.352	0.147	0.043	0.041	PN23
F	0.555	0.544	0.541	0.552	0.519	0.531	0.533	0.511	0.358	0.153	0.042	0.041
G	0.554	0.545	0.546	0.544	0.532	0.538	0.532	0.508	0.363	0.145	0.042	0.041
H	0.04	0.043	0.04	0.041	0.04	0.039	0.039	0.039	0.039	0.04	0.039	0.043	medium only
	0	0.346831	0.520246	0.780369	1.17055	1.75583	2.63374	3.95062	5.92593	8.88889	13.3333	20	PR39 ug/ml
	1	2	3	4	5	6	7	8	9	10	11	12
A	0.039	0.039	0.039	0.039	0.039	0.039	0.039	0.038	0.038	0.039	0.039	0.043	medium only
B	0.518	0.523	0.491	0.567	0.425	0.455	0.407	0.159	0.04	0.04	0.039	0.041	J53 control
C	0.515	0.528	0.531	0.528	0.525	0.515	0.429	0.136	0.04	0.039	0.04	0.043
D	0.504	0.521	0.475	0.532	0.498	0.502	0.402	0.136	0.039	0.04	0.04	0.042
E	0.523	0.507	0.52	0.524	0.49	0.517	0.531	0.402	0.046	0.039	0.04	0.041	PN23
F	0.54	0.507	0.517	0.509	0.519	0.513	0.527	0.231	0.055	0.039	0.04	0.043
G	0.562	0.524	0.536	0.531	0.52	0.528	0.542	0.328	0.074	0.04	0.04	0.04
H	0.04	0.039	0.039	0.04	0.039	0.039	0.039	0.038	0.039	0.039	0.039	0.043	medium only
	0	0.138732	0.208098	0.312148	0.468221	0.702332	1.0535	1.58025	2.37037	3.55556	5.33333	8	PRO1 ug/ml
	1	2	3	4	5	6	7	8	9	10	11	12
A	0.039	0.039	0.039	0.04	0.039	0.039	0.038	0.038	0.039	0.039	0.038	0.043	medium only
B	0.506	0.48	0.473	0.483	0.485	0.561	0.467	0.473	0.46	0.303	0.142	0.057	J53 control
C	0.525	0.488	0.474	0.482	0.493	0.491	0.584	0.618	0.466	0.266	0.126	0.063
D	0.509	0.473	0.468	0.562	0.492	0.508	0.51	0.486	0.464	0.244	0.113	0.06
E	0.493	0.478	0.48	0.475	0.486	0.49	0.469	0.501	0.449	0.327	0.16	0.106	PN23
F	0.489	0.472	0.477	0.476	0.475	0.487	0.474	0.499	0.45	0.325	0.162	0.112
G	0.493	0.475	0.467	0.474	0.475	0.484	0.484	0.495	0.457	0.35	0.18	0.069
H	0.039	0.039	0.039	0.039	0.039	0.039	0.04	0.039	0.039	0.039	0.039	0.044	medium only
	0	5.20246	7.80369	11.7055	17.5583	26.3374	39.5062	59.2593	88.8889	133.333	200	300	PROPH ug/ml
	1	2	3	4	5	6	7	8	9	10	11	12
A	0.039	0.039	0.039	0.04	0.039	0.039	0.039	0.039	0.04	0.039	0.039	0.043	medium only
B	0.5	0.55	0.525	0.546	0.505	0.503	0.502	0.501	0.402	0.041	0.041	0.042	J53 control
C	0.502	0.561	0.542	0.542	0.515	0.506	0.527	0.522	0.357	0.04	0.041	0.052
D	0.507	0.536	0.532	0.533	0.509	0.501	0.52	0.519	0.056	0.042	0.04	0.042
E	0.537	0.546	0.54	0.538	0.521	0.516	0.519	0.515	0.518	0.192	0.045	0.049	PN23
F	0.519	0.544	0.532	0.529	0.519	0.508	0.515	0.512	0.514	0.203	0.043	0.055
G	0.534	0.56	0.535	0.536	0.5	0.513	0.516	0.515	0.506	0.277	0.043	0.043
H	0.039	0.039	0.039	0.039	0.039	0.039	0.04	0.038	0.039	0.039	0.039	0.043	medium only
	0	1.38732	2.08098	3.12148	4.68221	7.02332	10.535	15.8025	23.7037	35.5556	53.3333	80	PMAP ug/ml
	1	2	3	4	5	6	7	8	9	10	11	12
A	0.038	0.039	0.039	0.038	0.036	0.043	0.043	0.042	0.041	0.035	0.037	0.044	medium only
B	0.305	0.423	0.351	0.416	0.302	0.257	0.25	0.289	0.299	0.361	0.04	0.039	J53 control
C	0.282	0.435	0.446	0.447	0.41	0.381	0.442	0.439	0.411	0.431	0.067	0.043
D	0.477	0.441	0.439	0.463	0.434	0.394	0.452	0.447	0.442	0.435	0.045	0.041
E	0.373	0.426	0.445	0.451	0.419	0.434	0.394	0.436	0.432	0.427	0.359	0.051	PN23
F	0.333	0.442	0.435	0.452	0.439	0.419	0.41	0.423	0.413	0.426	0.419	0.041
G	0.337	0.422	0.436	0.43	0.419	0.409	0.393	0.4	0.406	0.401	0.248	0.039
H	0.039	0.039	0.039	0.04	0.039	0.039	0.039	0.039	0.039	0.04	0.038	0.043	medium only
	0	0.138732	0.208098	0.312148	0.468221	0.702332	1.0535	1.58025	2.37037	3.55556	5.33333	8	CATH2 ug/ml
	1	2	3	4	5	6	7	8	9	10	11	12
A	0.039	0.039	0.039	0.039	0.039	0.039	0.04	0.039	0.039	0.04	0.039	0.044	medium only
B	0.552	0.52	0.537	0.479	0.513	0.446	0.503	0.188	0.144	0.072	0.074	0.057	J53 control
C	0.564	0.528	0.526	0.509	0.496	0.474	0.455	0.208	0.144	0.095	0.039	0.052
D	0.553	0.515	0.53	0.531	0.527	0.496	0.415	0.107	0.129	0.041	0.044	0.051
E	0.539	0.508	0.516	0.507	0.492	0.459	0.528	0.299	0.238	0.225	0.153	0.048	PN23
F	0.542	0.503	0.502	0.509	0.506	0.458	0.525	0.339	0.235	0.214	0.109	0.05
G	0.544	0.506	0.522	0.518	0.505	0.449	0.528	0.329	0.227	0.236	0.168	0.046
H	0.039	0.04	0.039	0.041	0.039	0.038	0.039	0.039	0.038	0.04	0.039	0.044	medium only
	0	0.867076	1.30061	1.95092	2.92638	4.38957	6.58436	9.87654	14.8148	22.2222	33.3333	50	FOW ug/ml
	1	2	3	4	5	6	7	8	9	10	11	12
A	0.041	0.04	0.04	0.041	0.041	0.039	0.04	0.039	0.04	0.04	0.043	0.04	medium only
B	0.04	0.584	0.04	0.041	0.041	0.041	0.043	0.04	0.041	0.04	0.038	0.04	J53 control
C	0.039	0.587	0.041	0.041	0.04	0.051	0.044	0.043	0.04	0.04	0.038	0.04
D	0.04	0.592	0.04	0.041	0.041	0.04	0.044	0.049	0.04	0.04	0.039	0.04
E	0.04	0.689	0.607	0.603	0.595	0.601	0.598	0.614	0.319	0.041	0.04	0.04	PN16
F	0.04	0.658	0.601	0.584	0.577	0.579	0.582	0.604	0.212	0.04	0.039	0.04
G	0.04	0.678	0.598	0.581	0.573	0.569	0.577	0.589	0.33	0.041	0.04	0.04
H	0.04	0.04	0.04	0.04	0.039	0.039	0.04	0.039	0.04	0.04	0.043	0.04	medium only
		0	0.312148	0.468221	0.702332	1.0535	1.58025	2.37037	3.55556	5.33333	8		COL ug/ml
	1	2	3	4	5	6	7	8	9	10	11	12
A	0.039	0.039	0.039	0.04	0.039	0.039	0.04	0.039	0.039	0.039	0.043	0.046	medium only
B	0.508	0.041	0.043	0.041	0.04	0.041	0.041	0.04	0.044	0.04	0.043	0.04	J53 control
C	0.525	0.041	0.043	0.04	0.04	0.04	0.042	0.04	0.04	0.04	0.04	0.04
D	0.521	0.04	0.04	0.04	0.04	0.04	0.04	0.04	0.039	0.04	0.045	0.039
E	0.521	0.53	0.531	0.523	0.514	0.519	0.518	0.469	0.181	0.042	0.04	0.039	PN23
F	0.513	0.509	0.516	0.506	0.519	0.511	0.494	0.439	0.087	0.039	0.04	0.039
G	0.505	0.509	0.505	0.483	0.457	0.431	0.41	0.346	0.105	0.039	0.04	0.039
H	0.039	0.039	0.039	0.04	0.039	0.039	0.038	0.038	0.038	0.039	0.039	0.043	medium only
	0	0.208098	0.312148	0.468221	0.702332	1.0535	1.58025	2.37037	3.55556	5.33333	8	12	COL ug/ml
	1	2	3	4	5	6	7	8	9	10	11	12
A	0.04	0.039	0.039	0.04	0.039	0.039	0.039	0.039	0.04	0.039	0.039	0.045	medium only
B	0.495	0.04	0.041	0.04	0.04	0.04	0.04	0.04	0.041	0.043	0.046	0.05	pSEVA EV control
C	0.484	0.039	0.04	0.04	0.04	0.04	0.041	0.04	0.041	0.043	0.044	0.051
D	0.483	0.041	0.04	0.04	0.04	0.04	0.04	0.04	0.041	0.043	0.043	0.051
E	0.498	0.455	0.433	0.411	0.362	0.27	0.125	0.073	0.04	0.042	0.043	0.049	pSEVA:MCR-1
F	0.497	0.481	0.454	0.424	0.383	0.306	0.148	0.112	0.041	0.042	0.043	0.054
G	0.51	0.473	0.449	0.429	0.38	0.313	0.143	0.079	0.041	0.042	0.044	0.057
H	0.043	0.039	0.038	0.039	0.039	0.039	0.039	0.039	0.039	0.039	0.039	0.044	medium only
	0	0.138732	0.208098	0.312148	0.468221	0.702332	1.0535	1.58025	2.37037	3.55556	5.33333	8	COL ug/ml
	1	2	3	4	5	6	7	8	9	10	11	12
A	0.044	0.039	0.04	0.04	0.039	0.039	0.04	0.039	0.039	0.04	0.043	0.044	medium only
B	0.04	0.571	0.158	0.04	0.041	0.041	0.041	0.04	0.04	0.039	0.039	0.039	J53 control
C	0.041	0.571	0.163	0.04	0.04	0.04	0.04	0.047	0.04	0.04	0.039	0.04
D	0.04	0.587	0.04	0.04	0.04	0.04	0.04	0.04	0.04	0.039	0.039	0.039
E	0.039	0.572	0.541	0.543	0.544	0.548	0.551	0.49	0.156	0.039	0.039	0.039	481
F	0.039	0.588	0.543	0.543	0.549	0.552	0.55	0.487	0.144	0.039	0.038	0.039
G	0.039	0.572	0.544	0.542	0.54	0.544	0.536	0.47	0.112	0.039	0.039	0.039
H	0.044	0.039	0.039	0.04	0.039	0.039	0.039	0.039	0.038	0.039	0.043	0.044	medium only
		0	0.117055	0.175583	0.263374	0.395062	0.592593	0.888889	1.33333	2	3		COL ug/ml
	1	2	3	4	5	6	7	8	9	10	11	12
A	0.04	0.039	0.039	0.04	0.039	0.039	0.039	0.039	0.04	0.039	0.043	0.039	medium only
B	0.039	0.576	0.04	0.041	0.04	0.04	0.048	0.039	0.039	0.039	0.04	0.039	J53 control
C	0.041	0.577	0.071	0.04	0.042	0.04	0.039	0.039	0.039	0.04	0.039	0.038
D	0.039	0.587	0.525	0.546	0.541	0.55	0.561	0.589	0.116	0.04	0.04	0.039	PN21
E	0.039	0.589	0.541	0.546	0.555	0.548	0.57	0.582	0.053	0.04	0.04	0.039
F	0.039	0.687	0.563	0.575	0.547	0.537	0.537	0.522	0.551	0.039	0.039	0.04	PN42
G	0.039	0.691	0.591	0.575	0.56	0.541	0.537	0.543	0.538	0.056	0.04	0.039
H	0.039	0.039	0.041	0.043	0.039	0.039	0.039	0.038	0.04	0.039	0.043	0.04	medium only
		0	0.312148	0.468221	0.702332	1.0535	1.58025	2.37037	3.55556	5.33333	8		COL ug/ml
	1	2	3	4	5	6	7	8	9	10	11	12
A	0.044	0.039	0.039	0.04	0.039	0.039	0.039	0.039	0.039	0.039	0.043	0.044	medium only
B	0.039	0.578	0.314	0.04	0.04	0.04	0.04	0.04	0.039	0.04	0.038	0.039	J53 control
C	0.039	0.586	0.198	0.04	0.04	0.04	0.04	0.04	0.04	0.04	0.039	0.039
D	0.039	0.574	0.323	0.182	0.04	0.04	0.04	0.04	0.04	0.04	0.039	0.039
E	0.039	0.578	0.545	0.537	0.544	0.534	0.538	0.517	0.387	0.134	0.089	0.04	WJ1
F	0.04	0.573	0.539	0.54	0.542	0.536	0.534	0.505	0.382	0.154	0.084	0.041
G	0.04	0.566	0.541	0.539	0.533	0.536	0.487	0.499	0.38	0.154	0.07	0.039
H	0.044	0.039	0.039	0.04	0.039	0.039	0.04	0.039	0.04	0.039	0.043	0.044	medium only
		0	0.117055	0.175583	0.263374	0.395062	0.592593	0.888889	1.33333	2	3		COL ug/ml

## Sheet: MHBII
	1	2	3	4	5	6	7	8	9	10	11	12
A	0.044	0.04	0.039	0.04	0.04	0.039	0.039	0.039	0.04	0.04	0.043	0.043	medium only
B	0.039	0.745	0.733	0.733	0.728	0.745	0.73	0.737	0.735	0.543	0.044	0.04	J53 control
C	0.04	0.621	0.772	0.753	0.748	0.749	0.725	0.745	0.717	0.51	0.043	0.039
D	0.041	0.644	0.757	0.708	0.746	0.756	0.749	0.725	0.714	0.284	0.043	0.039
E	0.04	0.666	0.729	0.766	0.743	0.719	0.696	0.75	0.746	0.694	0.718	0.04	PN16
F	0.041	0.659	0.697	0.676	0.688	0.691	0.694	0.709	0.69	0.638	0.696	0.04
G	0.04	0.697	0.726	0.741	0.75	0.731	0.737	0.737	0.733	0.655	0.672	0.039
H	0.044	0.04	0.039	0.039	0.039	0.039	0.04	0.039	0.04	0.04	0.043	0.044	medium only
		0	5.85277	8.77915	13.1687	19.7531	29.6296	44.4444	66.6667	100	150		LL37 ug/ml
	1	2	3	4	5	6	7	8	9	10	11	12
A	0.045	0.04	0.04	0.041	0.039	0.04	0.04	0.039	0.04	0.04	0.043	0.045	medium only
B	0.04	0.614	0.827	0.812	0.84	0.841	0.836	0.906	0.259	0.042	0.041	0.04	J53 control
C	0.041	0.585	0.825	0.797	0.809	0.806	0.82	0.896	0.042	0.043	0.042	0.041
D	0.04	0.567	0.793	0.781	0.777	0.79	0.78	0.876	0.042	0.041	0.042	0.04
E	0.04	0.65	0.732	0.712	0.711	0.703	0.719	0.757	0.681	0.041	0.041	0.039	PN16
F	0.04	0.633	0.718	0.696	0.714	0.716	0.7	0.765	0.655	0.041	0.041	0.04
G	0.04	0.596	0.747	0.713	0.736	0.744	0.732	0.804	0.38	0.04	0.041	0.049
H	0.044	0.04	0.039	0.041	0.04	0.039	0.039	0.039	0.039	0.04	0.043	0.045	medium only
		0	0.312148	0.468221	0.702332	1.0535	1.58025	2.37037	3.55556	5.33333	8		PRO1 ug/ml
	1	2	3	4	5	6	7	8	9	10	11	12
A	0.045	0.04	0.039	0.04	0.04	0.039	0.039	0.039	0.042	0.04	0.043	0.044	medium only
B	0.04	0.701	0.831	0.814	0.804	0.845	0.788	0.549	0.407	0.044	0.041	0.04	J53 control
C	0.04	0.633	0.815	0.849	0.809	0.819	0.695	0.626	0.344	0.04	0.04	0.04
D	0.04	0.646	0.801	0.741	0.737	0.718	0.677	0.527	0.534	0.088	0.04	0.04
E	0.04	0.641	0.719	0.709	0.728	0.738	0.75	0.775	0.719	0.54	0.145	0.04	PN16
F	0.041	0.654	0.705	0.698	0.711	0.728	0.727	0.741	0.795	0.584	0.196	0.041
G	0.041	0.656	0.729	0.715	0.713	0.736	0.741	0.762	0.758	0.571	0.1	0.04
H	0.044	0.04	0.04	0.04	0.039	0.04	0.04	0.039	0.04	0.04	0.044	0.045	medium only
		0	3.12148	4.68221	7.02332	10.535	15.8025	23.7037	35.5556	53.3333	80		CP1 ug/ml
	1	2	3	4	5	6	7	8	9	10	11	12
A	0.045	0.04	0.041	0.041	0.04	0.04	0.041	0.04	0.04	0.041	0.043	0.044	medium only
B	0.04	0.653	0.768	0.747	0.771	0.748	0.755	0.783	0.734	0.703	0.298	0.04	pSEVA EV control
C	0.041	0.686	0.796	0.787	0.771	0.804	0.799	0.808	0.771	0.648	0.045	0.041
D	0.041	0.599	0.782	0.781	0.774	0.738	0.753	0.752	0.758	0.04	0.044	0.043
E	0.04	0.596	0.765	0.749	0.773	0.771	0.778	0.79	0.791	0.746	0.783	0.04	pSEVA:MCR-1
F	0.04	0.698	0.776	0.774	0.774	0.782	0.78	0.789	0.789	0.743	0.797	0.04
G	0.041	0.583	0.796	0.79	0.787	0.796	0.8	0.807	0.8	0.72	0.782	0.04
H	0.044	0.041	0.04	0.041	0.04	0.04	0.04	0.04	0.039	0.04	0.044	0.044	medium only
		0	5.85277	8.77915	13.1687	19.7531	29.6296	44.4444	66.6667	100	150		LL37 ug/ml
	1	2	3	4	5	6	7	8	9	10	11	12
A	0.046	0.04	0.04	0.04	0.039	0.04	0.041	0.039	0.04	0.04	0.043	0.044	medium only
B	0.04	0.67	0.845	0.814	0.867	0.865	0.88	0.847	0.044	0.04	0.041	0.04	pSEVA EV control
C	0.041	0.65	0.884	0.832	0.882	0.839	0.875	0.814	0.043	0.042	0.042	0.041
D	0.041	0.647	0.795	0.776	0.772	0.742	0.789	0.739	0.042	0.042	0.042	0.04
E	0.04	0.626	0.783	0.755	0.751	0.727	0.784	0.834	0.043	0.041	0.043	0.04	pSEVA:MCR-1
F	0.04	0.764	0.787	0.753	0.764	0.749	0.8	0.868	0.31	0.041	0.05	0.04
G	0.041	0.767	0.813	0.799	0.794	0.776	0.82	0.872	0.19	0.042	0.046	0.04
H	0.045	0.04	0.039	0.042	0.04	0.04	0.039	0.04	0.039	0.041	0.043	0.044	medium only
		0	0.312148	0.468221	0.702332	1.0535	1.58025	2.37037	3.55556	5.33333	8		PRO1 ug/ml
	1	2	3	4	5	6	7	8	9	10	11	12
A	0.048	0.041	0.04	0.041	0.04	0.04	0.04	0.039	0.04	0.04	0.043	0.044	medium only
B	0.041	0.652	0.807	0.78	0.73	0.792	0.724	0.596	0.042	0.039	0.04	0.04	pSEVA EV control
C	0.04	0.732	0.853	0.829	0.793	0.834	0.812	0.614	0.039	0.04	0.042	0.039
D	0.041	0.671	0.813	0.797	0.755	0.785	0.677	0.501	0.04	0.041	0.04	0.04
E	0.04	0.587	0.792	0.77	0.776	0.789	0.779	0.811	0.88	0.831	0.837	0.04	pSEVA:MCR-1
F	0.04	0.712	0.793	0.777	0.767	0.789	0.769	0.797	0.834	0.796	0.65	0.042
G	0.045	0.623	0.82	0.799	0.783	0.809	0.778	0.819	0.826	0.778	0.767	0.04
H	0.044	0.04	0.04	0.04	0.039	0.04	0.04	0.039	0.041	0.04	0.043	0.044	medium only
		0	3.12148	4.68221	7.02332	10.535	15.8025	23.7037	35.5556	53.3333	80		CP1 ug/ml
