# Supplementary material for: The evolution of colistin resistance increases bacterial resistance to host antimicrobial peptides and virulence
Source: eLife. 2023 Apr 25;12:e84395. doi: 10.7554/eLife.84395 (PMC10129329; doi:10.7554/eLife.84395)
Supplement: Supplementary file 4. [file elife-84395-supp4.xlsx]

## Sheet: List of primers
Supplementary file 4 - Primers used in this study
Primer ID	Sequence 5'- 3'	Primer used for
pSEVA fwd	GTCGTGACTGGGAAAACCCTG	Vector backbone amplification for Gibson assembly
pSEVA Rev	TCCTGTGTGAAATTGTTATCCGCT	Vector backbone amplification for Gibson assembly
p16 mcr fwd	GATAACAATTTCACACAGGAGGATTGCGCAATGATTGC	mcr-1 gene and promoter amplification for Gibson assembly
p16 mcr rev	AGGGTTTTCCCAGTCACGACCATAATACGAATGGAGTGTGC	mcr-1 gene and promoter amplification for Gibson assembly
pSEVA_MCR seq 1	CGGCGGATTTGTCCTACTCA	Sequence verification of pSEVA:MCR-1 construct
pSEVA_MCR seq 2	ACAGCGTGGTGATCAGTAGC	Sequence verification of pSEVA:MCR-1 construct
pSEVA_MCR seq 3	ACCCCTGGATTCTCACCAAT	Sequence verification of pSEVA:MCR-1 construct
pSEVA_MCR seq 4	CGTATCATTGGTTTGGGTGTGC	PCR and Sequence verification of pSEVA:MCR-1 construct
pSEVA_MCR seq 5	GGTGCAGCATGATCAGCATATC	PCR and Sequence verification of pSEVA:MCR-1 construct
S1_pn23_amp_fwd	AAGGCTCCTTTTGGAGCCTTTTGCACACTCCATTCGTATTATGG	Amplification of PN23 (IncX4) Fragment 1 for Gibson assembly
S1_23 R	CATATTATCGAATCACAGCCGCCGGAAAACTATAATCCTGAATACAAAGCCTGGAAG	Amplification of PN23 (IncX4) Fragment 1 for Gibson assembly
S2_23 F	CTTCCAGGCTTTGTATTCAGGATTATAGTTTTCCGGCGGCTGTGATTCGATAATATG	Amplification of PN23 (IncX4) Fragment 2 for Gibson assembly
S2_23 R	TACAGAAGATGTATGGAGTGCTAATCACCACACAAAATTACTGGAACAGGGAACTAAG	Amplification of PN23 (IncX4) Fragment 2 for Gibson assembly
S3_23 F	CTTAGTTCCCTGTTCCAGTAATTTTGTGTGGTGATTAGCACTCCATACATCTTCTGTA	Amplification of PN23 (IncX4) Fragment 3 for Gibson assembly
S3_23 R	GATAAATTTACCTGTAAACTTCTTGGTATGTATGAGGAGAACGGAAAGGTATTTTCTTCTC	Amplification of PN23 (IncX4) Fragment 3 for Gibson assembly
S4_23 F	GAGAAGAAAATACCTTTCCGTTCTCCTCATACATACCAAGAAGTTTACAGGTAAATTTATC	Amplification of PN23 (IncX4) Fragment 4 for Gibson assembly
S4_23 R	CGAACTTAAGCAGAGTGATGTTGATTTAGTCCTTTTCTACAGGGACGAATATGAAA	Amplification of PN23 (IncX4) Fragment 4 for Gibson assembly
S5_23 F	TTTCATATTCGTCCCTGTAGAAAAGGACTAAATCAACATCACTCTGCTTAAGTTCG	Amplification of PN23 (IncX4) Fragment 5 for Gibson assembly
S5_pn23_amp_rev	CATTAGGCGGGCTACTAATTTAATAAACGGTGGGATAATTGCGG	Amplification of PN23 (IncX4) Fragment 5 for Gibson assembly
Amp_pn23_fwd	TTGCAGTATAATTGCCGCAATTATCCCACCGTTTATTAAATTAGTAGCCCGCC	Amplification of ampicillin resistance marker for Gibson assembly
Amp_pn23_rev	GCCCATAATACGAATGGAGTGTGCAAAAGGCTCCAAAAGGA	Amplification of ampicillin resistance marker for Gibson assembly
Moraxellamcr_gibsonfwd	CCGCAATTATCCCACCGTTTATTTTTTGAGTAGTTTCTCATGATGTCAGTGAATAACTCTCGATG	Amplification of Moraxella mcr gene for Gibson assembly
Moraxellamcr_gibsonrev	GTGCGGTGGGTTTGGAAAAATTACTTGATAAATAAAGGTTTGCC	Amplification of Moraxella mcr gene for Gibson assembly
pSEVA_mcrprom_fwd	TTTTTCCAAACCCACCGCAC	Amplification of vector backbone and promoter for Moraxella MCR Gibson assembly
pSEVA_mcrprom_rev	AAACGGTGGGATAATTGCGG	Amplification of vector backbone and promoter for Moraxella MCR Gibson assembly
