# Supplementary material for: The evolution of colistin resistance increases bacterial resistance to host antimicrobial peptides and virulence
Source: eLife. 2023 Apr 25;12:e84395. doi: 10.7554/eLife.84395 (PMC10129329; doi:10.7554/eLife.84395)
Supplement: Supplementary file 5. [file elife-84395-supp5.xlsx]

## Sheet: Sheet1
Supplementary file 5: List of bacterial strains used in this study.
	Strain	Description	Note
	E. coli J53	Wild-type
	E. coli J53 GFP	E. coli J53 carrying chromosomal integrated GFP
	E. coli MG1655	Wild-type
	E. coli J53-PN16 (IncI2)	E. coli J53 transconjugant harbouring PN16 (IncI2) MCR-1 plasmid
	E. coli J53-PN21 (IncI2)	E. coli J53 transconjugant harbouring PN21 (IncI2) MCR-1 plasmid
	E. coli J53-PN23 (IncX4)	E. coli J53 transconjugant harbouring PN23 (IncX4) MCR-1 plasmid
	E. coli J53-△mcr-1 PN23 (IncX4)	E. coli J53 transconjugant harbouring PN23 (IncX4) plasmid without MCR-1	Ampicillin (100 μg/ml) resistance marker
	E. coli J53-PN42 (IncX4)	E. coli J53 transconjugant harbouring PN42 (IncX4) MCR-1 plasmid
	E. coli J53-WJ1 (IncHI2)	E. coli J53 transconjugant harbouring WJ1 (IncHI2) MCR-3 plasmid
	E. coli J53-481 (IncP1)	E. coli J53 transconjugant harbouring 481 (IncP1) MCR-3 plasmid
	E. coli J53-pSEVA121: MCR-1	E. coli J53 harbouring pSEVA121 plasmid with MCR-1	Ampicillin (100 μg/ml) resistance marker
	E. coli J53-pSEVA121:EV	E. coli J53 harbouring pSEVA121 empty plasmid control (without MCR-1)	Ampicillin (100 μg/ml) resistance marker
	E. coli J53-pSEVA121: MCR-MOR	E. coli J53 harbouring pSEVA121 plasmid that carries Moraxella version of MCR	Ampicillin (100 μg/ml) resistance marker
