# Supplementary material for: The evolution of colistin resistance increases bacterial resistance to host antimicrobial peptides and virulence
Source: eLife. 2023 Apr 25;12:e84395. doi: 10.7554/eLife.84395 (PMC10129329; doi:10.7554/eLife.84395)
Supplement: Supplementary file 6. [file elife-84395-supp6.xlsx]

## Sheet: Sheet1
Supplementary file 6. Plasmids used in this study.
Plasmid	mcr gene	Size (bp)	Marker gene	Note	Source
PN16 (IncI2)	mcr-1	60488	-	MCR-1 natural plasmid belonging to IncI2 incompatibility group	Yang et al. Nat Commun 2017 (PMID: 29233990)
PN21 (IncI2)	mcr-1	60 989	-	MCR-1 natural plasmid belonging to IncI2 incompatibility group	Yang et al. Nat Commun 2017 (PMID: 29233990)
PN23 (IncX4)	mcr-1	33858	-	MCR-1 natural plasmid belonging to IncX4 incompatibility group	Yang et al. Nat Commun 2017 (PMID: 29233990)
△mcr-1 PN23 (IncX4)	-	33221	Ampicillin (100μg/ml)	MCR-1 deletion mutant of PN23 (IncX4)	This study
PN42 (IncX4)	mcr-1	32995	-	MCR-1 natural plasmid belonging to IncX4 incompatibility group	Yang et al. Nat Commun 2017 (PMID: 29233990)
WJ1 (IncHI2)	mcr-3	261119	-	MCR-3 natural plasmid belonging to IncHI2 incompatibility group	Yin et al. mBio 2017 (PMID: 28655818)
481 (IncP1)	mcr-3	53660	-	MCR-3 natural plasmid belonging to IncP1 incompatibility group	Wang et al. Veterinary Microbiology 2019 (PMID: 30827405)
pSEVA121:EV	-	3924	Ampicillin (100μg/ml)	pSEVA121 synthetic plasmid without MCR-1	Silva-Rocha et al. NAR 2013 (PMID: 23180763)
pSEVA121:MCR-1	mcr-1	5659	Ampicillin (100μg/ml)	pSEVA121 synthetic plasmid carrying MCR-1 and promoter	This study
pSEVA121:MCR-MOR	Moraxella version of MCR	5670	Ampicillin (100μg/ml)	pSEVA121 synthetic plasmid carrying Moraxella version of MCR	This study
